# Supplementary material
Source: Royal Society of Chemistry journal article supplement (doi:10.1039/d6gc01398h)
Supplement: d6gc01398h1.pdf [file d6gc01398h1.pdf]

| Primer         | Sequence                                                    |
|----------------|-------------------------------------------------------------|
| ET-C-Bce-F     | TAAGAAGGAGATATACCATGAATATGAAAGAAATTAGTAAAGTAGTGG            |
| ET-C-Bce-R     | TGGTGGTGGTGAAGAAGAACCTCTAACTCCTCAATCTTTCCA                  |
| ET-C-Bli-F     | TAAGAAGGAGATATACCATGAATATGGAAGATGCCGCAAG                    |
| ET-C-Bli-R     | TGGTGGTGGTGAAGAAGAACCTTCCACCTCTCTGATCCTGC                   |
| ET-C-Bme-F     | TAAGAAGGAGATATACCATGGATATTAGTAAAATTTACAGCTCAATT             |
| ET-C-Bme-R     | TGGTGGTGGTGAAGAAGAACACGTTGATGTACTCTTGCA                     |
| ET-C-Ppe-F     | TAAGAAGGAGATATACCATGAACCTTCAAGATATTGCCAAAA                  |
| ET-C-Ppe-R     | TGGTGGTGGTGAAGAAGAACCTGCTTCTCCAATTTTCATAAGGT                |
| ET-C-Cbu-F     | TAAGAAGGAGATATACCATGAATATAGATATAGCACAAAAGGTAGTA             |
| ET-C-Cbu-R     | TGGTGGTGGTGAAGAAGAACCTTTAATTTTACTTCTTTTGTAGCAAATCTTCTT      |
| ET-C-Ehu-F     | TAAGAAGGAGATATACCATGCAGCCTGACCTGCTCGATCTAC                  |
| ET-C-Ehu-R     | TGGTGGTGGTGAAGAAGAACCTGCCTGCTCCTCCAGCGTATAAAGC              |
| ET-C-Sau-F     | TAAGAAGGAGATATACCATGAATTATCTAAATAAAATACGTATTGAAAACC         |
| ET-C-Sau-R     | TGGTGGTGGTGAAGAAGAACCTTCCACCTCTTGAATACGAA                   |
| ET-C-Bst-F     | TAAGAAGGAGATATACCATGGCCGATTGGCGTGAATGGG                     |
| ET-C-Bst-R     | TGGTGGTGGTGAAGAAGAACCCCGTTGTTTCGACCTGTCCGTCAC               |
| ET-C-Sma-F     | TAAGAAGGAGATATACCATGATCGCTCGACCTGATGC                       |
| ET-C-Sma-R     | TGGTGGTGGTGAAGAAGAACCCAGATCCTCTCCGCGCAG                     |
| ET-C-Sty-F     | TAAGAAGGAGATATACCATGCAGCCTGACCTGCA                          |
| ET-C-Sty-R     | TGGTGGTGGTGAAGAAGAACCATTCGTTGCATTGGCCGC                     |
| PET-Ipk-F      | TAAGAAGGAGATATACCATGATTATTCTGAAACTTGGTGGTAGC                |
| PET-C-Ipk-R    | TGGTGGTGGTGAAGAAGAACCGTGTTTACCTGTAATACGTGTACCG              |
| KLD-IPK-R      | TTAGTGTTTACCTGTAATACGTGTA                                   |
| RS-Stythim-F   | TAATAAGGAGATATACCATGCAGCCTGACCTGCACTG                       |
| RBS-Stythim-R  | CATTTTAGCTCTCCTTAGATATCTTAATTCGTTGCATTGGCCGC                |
| IDI-IPK-RBS-F  | TGAGATATCTAAGGAGAGCTAAAATGATTATTCTGAAACTTGGTGGTAGC          |
| RS-IPK-IDI-R   | GTTTCTTTACCAGACTCGAGTTAATTGTGCTGCGCGAAAG                    |
| RS-Bsthim-F    | TAATAAGGAGATATACCATGGATGCACAATCAGCAGC                       |
| RBS-Bsthim-R   | CATTTTAGCTCTCCTTAGATATCTCATGAGACAGTCACCCTTTCTA              |
| RS-Smathim-F   | TAATAAGGAGATATACCATGATCGCTCGACCTGATGC                       |
| RBS-Smathim-R  | CATTTTAGCTCTCCTTAGATATCTCACAGATCCTCTCCGCG                   |
| RS-Nudix-F     | TAATAAGGAGATATACCATGGCGATGACAGTTGGTTA                       |
| RS-Nudix-R     | GTTTCTTTACCAGACTCGAGTCAAGAATGAGTAGTGAAAATATTGAAACT          |
| RS-Nudix-CDS-R | TTAGCTCTCCTTAGATATCTCAAGAATGAGTAGTGAAAATATTGAAACT           |
| RS-Nudix-CDS-F | GATATCTAAGGAGAGCTAAAATGACTACGACATTGAGCA                     |
| RS-Nudix2-F    | TAATAAGGAGATATACCATGGCGATGACAGTTGGTTTAGG                    |
| RS-Nudix2-R    | GTCATTTTAGCTCTCCTTAGATATCTCAAGAATGAGTAGTGAAAATATTGAAACTACCA |
| RSCDS-F        | CTTGAGATATCTAAGGAGAGCTAAAATGACTACGACATTGAGCA                |
| RS-ADH3-F      | TAATAAGGAGATATACCATGTCCTTAAACACTCCGGATGTTA                  |
| RS-ADH3-R      | CTCATTTTAGCTCTCCTTAGATATCTCAATCAAAGTTGATAAGAATCTTGACGC      |
| RSALDH3-F      | GATTGAGATATCTAAGGAGAGCTAAAATGAGTTCAGGAGCTAATGG              |
| RS-ALDH3-F     | TAATAAGGAGATATACCATGAGTTCAGGAGCTAATGGAA                     |
| RS-ALDH3-R     | GTTTCTTTACCAGACTCGAGCTAGAGCCATGGAGAATTGTATATG               |
| KLD-ALDH-F     | CGAAAAAGTTCTTTTCGTACATTGAGCTTGG                             |
| KLD-ALDH-R     | TATTGTTGTTTGTATTCTGAGGACCATGACGAG                           |
| KLD-ALDH-F2    | CAACAGGAGACCGTTTTGATGCC                                     |
| KLD-ALDH-R2    | CCCAATTTTTCACCGTTGCTTCCAG                                   |
| RSALDH-F       | ATTAAGATATCTAAGGAGAGCTAAAATGAGTTCAGGAGCTAATGG               |
| RS-ADH-F       | TAATAAGGAGATATACCATGAGCCTGAACACCCC                          |
| RS-ADH-ALDH-R  | CTCATTTTAGCTCTCCTTAGATATCTTAATCAAAGTTAATCAGGATCTTCACGC      |
| ET-His-ADH-F   | ATCATCACAGCAGCGCATGAGCCTGAACACCCC                           |
| ET-ADH-R       | TTGTTAGCAGCCGATCTCATTAATCAAAGTTAATCAGGATCTTCACGC            |
| ET-ADH-F       | TAAGAAGGAGATATACCATGAGCCTGAACACCCC                          |
| ET-ADH-His-R   | TGGTGGTGGTGAAGAAGAACCATCAAAGTTAATCAGGATCTTCACGC             |
| RS-CDS-F       | ACTACGACATTGAGCAG                                           |
| RSALDH4-F      | GATTGAGATATCTAAGGAGAGC                                      |
| RSAA-F         | AGTAAGAATTCTAAGGAGATAAAAATATGTCCTTAAACACTCCG                |

RS-NC-F TAATAAGGAGATATACCATGGCGATGACAGTTGGTTTA  
RS-NC-R GACATATTTTATCTCCTTAGAATTCTTACTTATGTCCCTTATACATCTTTTCCAG  
KLD-NCAA-F CCTGTTATAATGGTCCTCAAATTCAGACC  
KLD-NCAA-R GCCAAATATTTCTTCTTTGCTATGGT  
Duet-DAGK-F TAATAAGGAGATATACCATGCCTATGGACTTAAGAGATAATAAG  
Duet-DAGK-IPK-R TTTAGCTCTCCTTAGATATCTTAATGAAAAGCAAAAACCAAATTTTTG  
Duet-DAGKop-F TAATAAGGAGATATACCATGCCGATGGATCTGCG  
Duet-DAGKop-IPK-R TTTAGCTCTCCTTAGATATCTTAGTGGAACAGCAGGAACC  
Duet-Bce-F TAATAAGGAGATATACCATGAATATGAAAGAAATTAGTAAAGTAGTGGAT  
Duet-Bce-IPK-R TTTAGCTCTCCTTAGATATCTTACTCTAACTCCTCAATCTTTCCATA  
Duet-Bli-F TAATAAGGAGATATACCATGAATATGGAAGATGCCGCAAG  
Duet-Bli-IPK-R TTTAGCTCTCCTTAGATATCTTATTCCACCTCTCTGATCCTGC  
Duet-Cbu-F TAATAAGGAGATATACCATGAATATAGATATAGCACAAAAGGTAGTA  
Duet-Cbu-IPK-R TTTAGCTCTCCTTAGATATCTTATTTAATTTTACTTCTTTTTAGCAAATCTTCT  
Duet-Ehu-F TAATAAGGAGATATACCATGCAGCCTGACCTGCTC  
Duet-Ehu-IPK-R TTTAGCTCTCCTTAGATATCTCATGCCTGCTCCTCCAG  
Duet-Gst-F TAATAAGGAGATATACCATGGCCGATTGGCGTGAAT  
Duet-Gst-IPK-R TTTAGCTCTCCTTAGATATCTTACCGTTGTTTCGACCTGTCC  
Duet-Ec-F TAATAAGGAGATATACCATGCAAGTCGACCTGCTG  
Duet-Ec-IPK-R TTTAGCTCTCCTTAGATATCTTATGCCTGCACCTCCTG  
Duet-PhoN-F TAATAAGGAGATATACCATGTCTATTCCACCAGGTAACGA  
Duet-PhoN-IPK-R TTTAGCTCTCCTTAGATATCTTACTTCTTCTGGTTATTAGCAAATTCGCTC  
Duet-LicA-F TAATAAGGAGATATACCATGGAAAAGATCATCAAAGAGAAGATT  
Duet-LicA-IPK-R TTTAGCTCTCCTTAGATATCTTATTTTTCATCACTACCACCATAGC  
Duet-hcKa2-F TAATAAGGAGATATACCATGGGTCAACAGCCACCG  
Duet-hcKa2-IPK-R TTTAGCTCTCCTTAGATATCTTACACGCCAGTTACGTTTCTGA  
Duet-ScCK-F TAATAAGGAGATATACCATGGTACAAGAATCACGTCC  
Duet-ScCK-IPK-R TTTAGCTCTCCTTAGATATCTTACAAATAACTAGTATCGAGGAACTTG  
IK-IPK-F GATATCTAAGGAGAGCTAAAATGATTAT  
RS-C-Thim-F TAATAAGGAGATATACCATGCAAGTCGACCTGC  
RS-C-Thim-R TGATGGTGATGGGAAGAACCCTGCCTGCACCTCCT  
RS-C-BSThim-F TAATAAGGAGATATACCATGGATGCACAATCAGC  
RS-C-BSThim-R TGATGGTGATGGGAAGAACCCTGAGACAGTCACCCTTTC  
ET-BSThim-F TAAGAAGGAGATATACCATGGATGCACAATCAGCAGCAAAT  
ET-C-BSThim-R TGGTGGTGGTGAGAAGAACCCTGAGACAGTCACCCTTTCTATAGT  
RS-N-LicA-F CACAGCTCAGGAATGGAAAAGATCATCAAAGAGAA  
RS-N-LicA-R GTTTCTTTACCAGACTCGAGTTATTTTTCATCACTACCACCATA  
RS-C-LicA-F TAATAAGGAGATATACCATGGAAAAGATCATCAAAGAGAA  
RS-C-LicA-R TGATGGTGATGGGAAGAACCCTTTTTCATCACTACCACCATAG  
RS-N-hcKa2-F CACAGCTCAGGAATGGGTCAACAGCCA  
RS-N-hcKa2-R GTTTCTTTACCAGACTCGAGTTACACGCCAGTTTAC  
RS-C-hcKa2-F TAATAAGGAGATATACCATGGGTCAACAGCCA  
RS-C-hcKa2-R TGATGGTGATGGGAAGAACCACGCCAGTTTACG  
RS-N-ScCK-F CACAGCTCAGGAATGGTACAAGAATCACGTC  
RS-N-ScCK-R GTTTCTTTACCAGACTCGAGTTACAAATAACTAGTATCGAGGAACT  
RS-C-ScCK-F TAATAAGGAGATATACCATGGTACAAGAATCACGTC  
RS-C-ScCK-R TGATGGTGATGGGAAGAACCCTAAATAACTAGTATCGAGGAACT  
RS-N-PhoN-F CACAGCTCAGGAATGTCTATTCCACCAGGTAA  
RS-N-PhoN-R GTTTCTTTACCAGACTCGAGTTACTTCTTCTGGTTATTAGCAA  
RS-C-PhoN-F TAATAAGGAGATATACCATGTCTATTCCACCAGGTAA  
RS-C-PhoN-R TGATGGTGATGGGAAGAACCCTTCTTCTGGTTATTAGCAAATTC  
CDS-Nudix-F GATATCTAAGGAGAGCTAAAATGGCGATGACAGTTG  
CDS-Nudix-R TTTAGCTCTCCTTAGATATCTTACTTATGTCCCTTATACATCTTTTC  
RS-CDS-F2 TAATAAGGAGATATACCATGACTACGACATTGAGCAG  
RS-CDS-R2 GTTTCTTTACCAGACTCGAGTTACTTATGTCCCTTATACATCTTTTCCAG  
RSAAM-ADHm-F AGCTCAGGAATGTCCTTAAACACTCCGG  
RSAAM-R GCTGCTGCCCATGGTATATCTCCTTATTAAGTTAAACA  
RSAAM-SUMO-F GATATACCATGGGCAGCAGCATGTCGGACTCAGAA

RSAAM-SUMO-R TTTAAGGACATTCTGAGCTGGATCCACCAATCTGTTCTC  
 RSAAM-GST-F GATATACCATGGGCAGCAGCATGTCCCCTATACTAGGTTATTGGA  
 RSAAM-GST-R TTTAAGGACATTCTGAGCTTTTTGGAGGATGGTCGCC  
 RSAAM-TRX-F GATATACCATGGGCAGCAGCAGGATAAAAATTATTCACCTGACTGACGAC  
 RSAAM-TRX-R TTTAAGGACATTCTGAGCTGGCCAGGTTAGCGTCGAG  
 Duet-TFactor-F TAATAAGGAGATATAACCATGCAAGTTTCAGTTGAAACCACTCA  
 Duet-TFactor-R GTTTCTTTACCAGACTCGAGTTACGCCTGCTGGTTCATCA  
 Duet-GroESL-F TAATAAGGAGATATAACCATGAATATTCGTCCATTGCATGATCGCG  
 Duet-GroESL-R GTTTCTTTACCAGACTCGAGTTACATCATGCCGCCATGC  
 Duet-DnaKJ-F TAATAAGGAGATATAACCATGGGTAAAATAATTGGTATCGACCTGGGT  
 Duet-DnaKJ-R GTTTCTTTACCAGACTCGAGTTAGCGGGTCAGGTCGTCGA  
 Duet-clpB-F TAATAAGGAGATATAACCATGCGTCTGGATCGTCTTACTAATAAATTC  
 Duet-clpB-R GTTTCTTTACCAGACTCGAGTTACTGGACGGCGACAATCC  
 RSAAS-ADHs-F AGCTCAGGAATGAGCCTGAACACCC  
 RSAAS-SUMO-R TTCAGGCTCATTCTGAGCTGGATCCACCAATCTGTTCTC  
 RSAAS-GST-R TTCAGGCTCATTCTGAGCTTTTTGGAGGATGGTCGCC  
 RSAAS-TRX-R TTCAGGCTCATTCTGAGCTGGCCAGGTTAGCGTCGAG  
 (PT)4P-CDS-F CCAACACCTACTCCCACACCAACGCCTATGACTACGACATTGAGCAG  
 Nudix-R AGAATGAGTAGTGAAAATATTGAAACTACC  
 (PT)4P-Nudix-F CCAACACCTACTCCCACACCAACGCCTATGGCGATGACAGTTGGT  
 CDS-R CTTATGTCCCTTATACATCTTTTCCAGA  
 (GSG)3-CDS-F GGTAGCGGTGGTAGCGGTGGTAGCGGTATGACTACGACATTGAGCAG  
 (GSG)3-Nudix-F GGTAGCGGTGGTAGCGGTGGTAGCGGTATGGCGATGACAGTTGGT  
 28a-NHis-CDS-F ATCATCACAGCAGCGGCATGACTACGACATTGAGCAG  
 28a-CDS-R TTGTTAGCAGCCGGATCTCATTACTTATGTCCCTTATACATCTTTTCC  
 28a-Nudix-F TAAGAAGGAGATATAACCATGGCGATGACAGTTGG  
 28a-Nudix-CHis-R TGGTGGTGGTGAGAAGAACCAGAATGAGTAGTGAAAATATTGAAACTACC  
 28a-NHis-IPK-F ATCATCACAGCAGCGGCATGATTATTCTGAACTTGGTGGTA  
 28a-IPK-R TTGTTAGCAGCCGGATCTCATTAGTGTTCACCTGTAATACGTGTAC  
 28a-NHis-AtIPK-F ATCATCACAGCAGCGGCATGGAGCTGAATATTTCCGA  
 28a-AtIPK-R TTGTTAGCAGCCGGATCTCATTACTTTGAGAATCTGATGATAGTACC  
 SUMO-CDS-R GTCGTAGTCATTCTGAGCTGGATCCAC  
 GST-CDS-R GTCGTAGTCATTCTGAGCTTTTTGGAGGATG  
 TAG-CDS-F AGCTCAGGAATGACTACGACATTGAGCA  
 Duet-Nudix-R GTTTCTTTACCAGACTCGAGTCAAGAATGAGTAGTGAAAATATTGAAA  
 Nudix-RBS-R TTTAGCTCTCCTTAGATATCTCAAG  
 RBS-SUMO-F GATATCTAAGGAGAGCTAAAATGGGCAGCAGCATGT  
 Duet-CDS-R GTTTCTTTACCAGACTCGAGTTACTTATGTCCCTTATACATCTTTTCCAG  
 TAG-SMA-F AGCTCAGGAATGATCGCTCGACCTG  
 SUMO-SMA-R CGAGCGATCATTCTGAGCTGGATCCA  
 IPK-65-F ATGATTATTCTGAACTTGGTGGTAGC  
 SMA-66-KR9-R TTTACGTTTCTTTTTCTGGCGTTTCTTCAGATCCTCTCCGCGC  
 SMA-66-PT-R AGGCGTTGGTGTGGGAGTAGGTGTTGGCAGATCCTCTCCGCGC  
 28a-Nudix-R TTGTTAGCAGCCGGATCTCATCAAGAATGAGTAGTGAAAATATTGAAACT  
 28a-BliPK-F ATCATCACAGCAGCGGCATGAGAAAGACTAAAATAGTTTGTACAA  
 28a-BliPK-R TTGTTAGCAGCCGGATCTCATTAAAGCACGCTTGCAC  
 28a-ZmoPK-F ATCATCACAGCAGCGGCATGACTGAAGGACTTTTCCACG  
 28a-ZmoPK-R TTGTTAGCAGCCGGATCTCATTAGGCTTCGATAACATCAACAATGT  
 28a-MsmPK-F ATCATCACAGCAGCGGCATGAGCAGACGCGAAAGATCG  
 28a-MsmPK-R TTGTTAGCAGCCGGATCTCACTAGACGTCGTCCTCTCCGA  
 28a-NHis-ALDH-F ATCATCACAGCAGCGGCATGAGTTCAGGAGCTAATGGAA  
 28a-ALDH-R TTGTTAGCAGCCGGATCTCACTAGAGCCATGGAGAATTGTATATG  
 Duet-ATFKI-F TAATAAGGAGATATAACCATGGTGTATGTTTCCGGAAAA  
 Sumo-ATFKI-F GATCCAGCTCAGGAATGGTGTATGTTTCCGGAAAA  
 ATFKI-IPK-R TTTAGCTCTCCTTAGATATCTTAGAAGAGTAAGAATCCGGC  
 IK-IPK-F GATATCTAAGGAGAGCTAAAATGATTAT  
 Sumo-ATFKI-R CACCATTCTGAGCTGGATC  
 pET28aHis-R CATGCCGCTGCTGTGATGATGATG

|               |                               |
|---------------|-------------------------------|
| pET28a-F      | TGAGATCCGGCTGCTAACAAAG        |
| pet28a-R      | CATGGTATATCTCCTTCTTAAAGTTAAAC |
| pet28aChis-F  | GGTTCTTCTCACCACCACCACCACC     |
| Duet-XhoI-F   | CTCGAGTCTGGTAAAGAAACCG        |
| Duet-XhoI-F2  | CTCGAGTCTGGTAAAGAAAC          |
| Duet-1stATG-R | CATGGTATATCTCCTTATTAAAGTTAAAC |
| Duet-1stATG-F | GTTTAACTTAAATAAGGAGATATACCATG |
