# Supplementary material
Source: Royal Society of Chemistry journal article supplement (doi:10.1039/d6gc01398h)
Supplement: d6gc01398h2.pdf [file d6gc01398h2.pdf]

## Supplementary Information

# **An enzyme cascade for green synthesis of chrysanthemol and chrysanthemic acid: key precursors for pyrethrin and pyrethroids**

Zhanyue Liao,<sup>a</sup> Chuncen Chen,<sup>a</sup> Junyi Lu,<sup>a,c</sup> Donghua Du,<sup>b</sup> Huailong Teng,<sup>b</sup> Yi Zhou,<sup>a</sup>  
Shuke Wu\*<sup>a</sup>

a. National Key Laboratory of Agricultural Microbiology, College of Life Science and  
Technology, Huazhong Agricultural University, 1 Shizishan Street, Wuhan 430070,  
P.R. China. E-mail: shukewu@mail.hzau.edu.cn

b. College of Chemistry, Huazhong Agricultural University, 1 Shizishan Street,  
Wuhan 430070, P.R. China.

c. Current Address: School of Biochemistry, University of Bristol, University Walk,  
Bristol, BS8 1TD, UK

## General information

Ethyl laurate, prenol, and (1*R*,3*R*)-chrysanthemic acid were purchased from Shanghai Haohong Scientific Co., Ltd. (Shanghai, China). Isoprenol, NAD<sup>+</sup>, NADH, methyl tert-butyl ether (MTBE), and (±)-chrysanthemic acid were purchased from Shanghai Macklin Biochemical Technology Co., Ltd. (Shanghai, China). Ethyl chrysanthemate was purchased from Shaoyuan Technology Co., Ltd. (Shanghai, China). Sodium pyruvate was purchased from Bide Pharmatech Co., Ltd. (Shanghai, China). phosphoenolpyruvate (PEP) and ATP were purchased from Shanghai Dibo Biotech Co., Ltd. (Shanghai, China). pyruvate kinase (PK) was purchased from J&K Chemical Co., Ltd. (Shanghai, China). Other chemicals and reagents are purchased from commercial suppliers and used without further purification.

The genes of *SpLicA*, *SyPhoN*, *SmDAGK*, *MtIPK*, *TcADH2*, *TcADH2low*, *TcCDS* were synthesized by SynBio Technologies (Suzhou, China) with codon optimization for *E. coli*. Other genes are cloned from the genome of microbes or the cDNA of plants (*Arabidopsis thaliana*, *Tanacetum cinerariifolium*).

## Construction of Plasmids Used in This Study

Detailed cloning steps are described in the Molecular Biology Methods section within the Method section of the article. The details of primers

Linearized pETDuet, pACYCDuet, and pRSFDuet vectors were cloned using primers Duet-XhoI-F and Duet-1stATG-R. Linearized pET28a was cloned using primers pet28aChis-F and pet28a-R (for C-terminal His-tag), or pET28a-F and pET28aNhis-R (for N-terminal His-tag).

The *EcThiM* gene in pRSFDuet-*EcThiM*-CHis was cloned from the *Escherichia coli* genomic library using primers RS-C-Thim-F and RS-C-Thim-R.

The *BsThiM* gene in pRSFDuet-*BsThiM*-CHis was cloned from the *Bacillus subtilis* genomic library using primers RS-C-BsThim-F and RS-C-BsThim-R.

The *SpLicA* gene in pRSFDuet-*SpLicA*-CHis was cloned from synthesized *SpLicA* gene using primers RS-C-LicA-F and RS-C-LicA-R.

The *ScCK* gene in pRSFDuet-*ScCK*-CHis was cloned from the *Saccharomyces cerevisiae* genomic library using primers RS-C-ScCK-F and RS-C-ScCK-R.

The *SfPhoN* gene in pRSFDuet-*SfPhoN*-CHis was cloned from synthesized *SfPhoN* gene using primers RS-C-PhoN-F and RS-C-PhoN-R.

The *BceThiM* gene in pET28a-*BceThiM*-CHis was cloned from the *Bacillus cereus* genomic library using primers ET-C-Bce-F and ET-C-Bce-R.

The *BliThiM* gene in pET28a-*BliThiM*-CHis was cloned from the *Bacillus licheniformis* genomic library using primers ET-C-Bli-F and ET-C-Bli-R.

The *CbuThiM* gene in pET28a-*CbuThiM*-CHis was cloned from the *Clostridium butyricum* genomic library using primers ET-C-Cbu-F and ET-C-Cbu-R.

The *EhuThiM* gene in pET28a-*EhuThiM*-CHis was cloned from the *Enterobacter huaxiensis* genomic library using primers ET-C-Ehu-F and ET-C-Ehu-R.

The *GstThiM* gene in pET28a-*GstThiM*-CHis was cloned from the *Geobacillus stearothermophilus* genomic library using primers ET-C-Gst-F and ET-C-Gst-R.

The *SmaThiM* gene in pET28a-*SmaThiM*-CHis was cloned from the *Serratia marcescens* genomic library using primers ET-C-Sma-F and ET-C-Sma-R.

The *StyThiM* gene in pET28a-*StyThiM*-CHis was cloned from the *Salmonella typhimurium* genomic library using primers ET-C-Sty-F and ET-C-Sty-R.

The *MtIPK* gene in pETDuet-IPK was cloned from the synthesized *MtIPK* gene using primers PET-Ipk-F and KLD-IPK-R.

The *SmaThiM* gene in pETDuet-*SmaThiM*-IPK was cloned from pET28a-*SmaThiM*-CHis using primers RS-Smathim-F and RBS-Smathim-R. The IPK gene was cloned from pETDuet-IPK using primers IDI-IPK-RBS-F and Duet-1stATG-R.

The *BsThiM* gene in pETDuet-*BsThiM*-IPK was cloned from pRSFDuet-*BsThiM*-CHis using primers RS-Bsthim-F and RBS-Bsthim-R. The IPK gene was cloned from pETDuet-IPK using primers IDI-IPK-RBS-F and Duet-1stATG-R.

The *StyThiM* gene in pETDuet-*StyThiM*-IPK was cloned from pET28a-*StyThiM*-CHis using primers RS-Stythim-F and RBS-Stythim-R. The IPK gene was cloned from pETDuet-IPK using primers IDI-IPK-RBS-F and Duet-1stATG-R.

The *SmDAGK* gene in pETDuet-*SmDAGK*-IPK was cloned from synthesized *SmDAGK* gene using primers Duet-DAGKop-F and Duet-DAGKop-IPK-R. The IPK gene was cloned from pETDuet-*SmaThiM*-IPK using primers IK-IPK-F and Duet-1stATG-R.

The *BceThiM* gene in pETDuet-*BceThiM*-IPK was cloned from pET28a-*BceThiM*-CHis using primers Duet-Bce-F and Duet-Bce-IPK-R. The IPK gene was cloned from pETDuet-*SmaThiM*-IPK using primers IK-IPK-F and Duet-1stATG-R.

The *BliThiM* gene in pETDuet-*BliThiM*-IPK was cloned from pET28a-*BliThiM*-CHis using primers Duet-Bli-F and Duet-Bli-IPK-R. The IPK gene was cloned from pETDuet-*SmaThiM*-IPK using primers IK-IPK-F and Duet-1stATG-R.

The *CbuThiM* gene in pETDuet-*CbuThiM*-IPK was cloned from pET28a-*CbuThiM*-CHis using primers Duet-Cbu-F and Duet-Cbu-IPK-R. The IPK gene was cloned from pETDuet-*SmaThiM*-IPK using primers IK-IPK-F and Duet-1stATG-R.

The *EhuThiM* gene in pETDuet-*EhuThiM*-IPK was cloned from pET28a-*EhuThiM*-CHis using primers Duet-Ehu-F and Duet-Ehu-IPK-R. The IPK gene was cloned from pETDuet-*SmaThiM*-IPK using primers IK-IPK-F and Duet-1stATG-R.

The *GstThiM* gene in pETDuet-*GstThiM*-IPK was cloned from pET28a-*GstThiM*-CHis using primers Duet-Gst-F and Duet-Gst-IPK-R. The IPK gene was cloned from pETDuet-*SmaThiM*-IPK using primers IK-IPK-F and Duet-1stATG-R.

The *EcThiM* gene in pETDuet-*EcThiM*-IPK was cloned from pRSFDuet-*EcThiM*-CHis using primers Duet-Ec-F and Duet-Ec-IPK-R. The IPK gene was cloned from pETDuet-*SmaThiM*-IPK using primers IK-IPK-F and Duet-1stATG-R.

The *SfPhoN* gene in pETDuet-*SfPhoN*-IPK was cloned from pRSFDuet-*SfPhoN*-CHis using primers Duet-PhoN-F and Duet-PhoN-IPK-R. The IPK gene was cloned from pETDuet-*Sma*ThiM-IPK using primers IK-IPK-F and Duet-1stATG-R.

The *SpLicA* gene in pETDuet-*SpLicA*-IPK was cloned from pRSFDuet-*SpLicA*-CHis using primers Duet-LicA-F and Duet-LicA-IPK-R. The IPK gene was cloned from pETDuet-*Sma*ThiM-IPK using primers IK-IPK-F and Duet-1stATG-R.

The *ScCK* gene in pETDuet-*ScCK*-IPK was cloned from pRSFDuet-*ScCK*-CHis using primers Duet-ScCK-F and Duet-ScCK-IPK-R. The IPK gene was cloned from pETDuet-*Sma*ThiM-IPK using primers IK-IPK-F and Duet-1stATG-R.

The *TcALDH1* gene in pRSFDuet-*TcALDH1* was cloned from the *Tanacetum cinerariifolium* cDNA library using primers RS-ALDH3-F and RS-ALDH3-R.

The *TcADH2* gene in pRSFDuet-*TcADH2*-*TcALDH1* was cloned from synthesized *TcADH2* gene using primers RS-ADH-F and RS-ADH-ALDH-R; The *TcALDH1* gene was cloned from pRSFDuet-*TcALDH1* using primers RSALDH-F and Duet-1stATG-R.

The *TcADH2* gene in pET28a-NHis-*TcADH2* was cloned from synthesized *TcADH2* gene using primers ET-His-ADH-F and ET-ADH-R.

The *TcADH2low* gene in pRSFDuet-*TcADH2low*-*TcALDH1* was cloned from synthesized *TcADH2low* gene using primers RS-ADH3-F and RS-ADH3-R. The *TcALDH1* gene was cloned from pRSFDuet-*TcADH2*-*TcALDH1* using primers RSALDH4-F and Duet-1stATG-R.

The *TcNudix* gene in pRSFDuet-*TcNudix* was cloned from the *Tanacetum cinerariifolium* cDNA library using primers RS-Nudix-F and RS-Nudix-R.

The *TcCDS* gene in pRSFDuet-*TcCDS* was cloned from synthesized *TcCDS* gene using primers RS-CDS-F2 and RS-CDS-R2.

The *TcNudix* gene in pRSFDuet-*TcNudix*-*TcCDS* was cloned from pRSFDuet-*TcNudix* using primers RS-Nudix2-F and RS-Nudix2-R; The *TcCDS* gene was cloned from pRSFDuet-*TcCDS* using primers RSCDS-F and Duet-1stATG-R.

The *TcCDS* gene in pRSFDuet-*TcCDS*-*TcNudix* was cloned from pRSFDuet-*TcCDS* using primers Duet-1stATG-F and CDS-Nudix-R; The *TcNudix* gene was cloned from pRSFDuet-*TcNudix* using primers CDS-Nudix-F and Duet-1stATG-R.

The *TcNudix*-*TcCDS* gene in pACYCDuet-*TcNudix*-*TcCDS* and pCDFDuet-*TcNudix*-*TcCDS* was cloned from pRSFDuet-*TcNudix*-*TcCDS* using primers Duet-1stATG-F and Duet-XhoI-R.

The *TcCDS*-*TcNudix* gene in pACYCDuet-*TcCDS*-*TcNudix* and pCDFDuet-*TcCDS*-*TcNudix* was cloned from pRSFDuet-*TcCDS*-*TcNudix* using primers Duet-1stATG-F and Duet-XhoI-R.

The *TcADH2low-TcALDH1* gene in pRSFDuet-Sumo*TcADH2low-TcALDH1* was cloned from pRSFDuet-*TcADH2low-TcALDH1* using primers RSAAM-ADHm-F and RSAAM-R. The Sumo tag gene was cloned from commercially available plasmid using primers RSAAM-SUMO-F and RSAAM-SUMO-R.

The *TcADH2low-TcALDH1* gene in pRSFDuet-Gst*TcADH2low-TcALDH1* was cloned from pRSFDuet-*TcADH2low-TcALDH1* using primers RSAAM-ADHm-F and RSAAM-R. The Gst tag gene was cloned from commercially available plasmid using primers RSAAM-Gst-F and RSAAM-Gst-R.

The *TcADH2low-TcALDH1* gene in pRSFDuet-Trx*TcADH2low-TcALDH1* was cloned from pRSFDuet-*TcADH2low-TcALDH1* using primers RSAAM-ADHm-F and RSAAM-R. The Trx tag gene was cloned from the *Escherichia coli* genomic library using primers RSAAM-Trx-F and RSAAM-Trx-R.

The *TcADH2-TcALDH1* gene in pRSFDuet-Sumo*TcADH2-TcALDH1* was cloned from pRSFDuet-*TcADH2-TcALDH1* using primers RSAAS-ADHs-F and RSAAM-R. The Sumo tag gene was cloned from commercially available plasmid using primers RSAAM-SUMO-F and RSAAS-SUMO-R.

The *TcADH2-TcALDH1* gene in pRSFDuet-Gst*TcADH2-TcALDH1* was cloned from pRSFDuet-*TcADH2-TcALDH1* using primers RSAAS-ADHs-F and RSAAM-R. The Gst tag gene was cloned from commercially available plasmid using primers RSAAM-Gst-F and RSAAS-Gst-R.

The *TcADH2-TcALDH1* gene in pRSFDuet-Trx*TcADH2-TcALDH1* was cloned from pRSFDuet-*TcADH2-TcALDH1* using primers RSAAS-ADHs-F and RSAAM-R. The Trx tag gene was cloned from the *Escherichia coli* genomic library using primers RSAAM-Trx-F and RSAAS-Trx-R.

The trigger factor gene in pCDFDuet-TriggerFactor was cloned from the *Escherichia coli* genomic library using primers Duet-TFactor-F and Duet-TFactor-R.

The GroES-GroEL gene in pCDFDuet-GroES-GroEL was cloned from the *Escherichia coli* genomic library using primers Duet-GroESL-F and Duet-GroESL-R.

The DnaK-DnaJ gene in pCDFDuet-DnaK-DnaJ was cloned from the *Escherichia coli* genomic library using primers Duet-DnaKJ-F and Duet-DnaKJ-R.

The ClpB gene in pCDFDuet-ClpB was cloned from the *Escherichia coli* genomic library using primers Duet-clpB-F and Duet-clpB-R.

pACYCDuet-*TcNudix*-(GSG)<sub>3</sub>-*TcCDS* was generated from pACYCDuet-*TcNudix-TcCDS* by inverse PCR using primers (GSG)<sub>3</sub>-CDS-F and Nudix-R.

pACYCDuet-*TcNudix*-(PT)<sub>4</sub>P-*TcCDS* was generated from pACYCDuet-*TcNudix-TcCDS* by inverse PCR using primers (PT)<sub>4</sub>P-CDS-F and *Nudix*-R.

pACYCDuet-*TcCDS*-(GSG)<sub>3</sub>-*TcNudix* was generated from pACYCDuet-*TcCDS-TcNudix* by inverse PCR using primers (GSG)<sub>3</sub>-CDS-F and CDS-R.

pACYCDuet-*TcCDS*-(PT)<sub>4</sub>P-*TcNudix* was generated from pACYCDuet-*TcCDS-TcNudix* by inverse PCR using primers (PT)<sub>4</sub>P-*Nudix*-F and CDS-R.

The *TcCDS* gene in pET28a-NHis-*TcCDS* was cloned from pACYCDuet-*TcNudix-TcCDS* using primers 28a-NHis-CDS-F and 28a-CDS-R.

The *TcNudix* gene in pET28a-*TcNudix*-CHis was cloned from pACYCDuet-*TcNudix-TcCDS* using primers 28a-*Nudix*-F and 28a-*Nudix*-CHis-R.

The *MtIPK* gene in pET28a-NHis-IPK was cloned from pETDuet-IPK using primers 28a-NHis-IPK-F and 28a-IPK-R.

The *TcCDS* gene in pET28a-NHis-*TcCDS* was cloned from pACYCDuet-*TcNudix-TcCDS* using primers 28a-NHis-CDS-F and 28a-CDS-R.

The *TcCDS*-(PT)<sub>4</sub>P-*TcNudix* gene in pRSFDuet-Sumo*TcCDS*-(PT)<sub>4</sub>P-*TcNudix* was cloned from pACYCDuet-*TcCDS*-(PT)<sub>4</sub>P-*TcNudix* using primers TAG-CDS-F and Duet-*Nudix*-R. The Sumo tag gene was cloned from pRSFDuet-Sumo*TcADH2-TcALDH1* using primers SUMO-CDS-R and Duet-XhoI-F.

The *TcCDS*-(PT)<sub>4</sub>P-*TcNudix* gene in pRSFDuet-Gst*TcCDS*-(PT)<sub>4</sub>P-*TcNudix* was cloned from pACYCDuet-*TcCDS*-(PT)<sub>4</sub>P-*TcNudix* using primers TAG-CDS-F and Duet-*Nudix*-R. The Gst tag gene was cloned from pRSFDuet-Gst*TcADH2-TcALDH1* using primers GST-CDS-R and Duet-XhoI-F.

The Sumo*TcCDS*-(PT)<sub>4</sub>P-*TcNudix* gene in pACYCDuet-Sumo*TcCDS*-(PT)<sub>4</sub>P-*TcNudix* was cloned from pRSFDuet-Sumo*TcCDS*-(PT)<sub>4</sub>P-*TcNudix* using primers Duet-1stATG-F and Duet-XhoI-R.

The Gst*TcCDS*-(PT)<sub>4</sub>P-*TcNudix* gene in pACYCDuet-Gst*TcCDS*-(PT)<sub>4</sub>P-*TcNudix* was cloned from pRSFDuet-Gst*TcCDS*-(PT)<sub>4</sub>P-*TcNudix* using primers Duet-1stATG-F and Duet-XhoI-R.

The *TcNudix* gene in pACYCDuet-*TcNudix*-Sumo*TcCDS* was cloned from pACYCDuet-*TcNudix-TcCDS* using primers Duet-XhoI-F2 and *Nudix*-RBS-R. The Sumo*TcCDS* gene was cloned from pRSFDuet-Sumo*TcCDS*-(PT)<sub>4</sub>P-*TcNudix* using primers RBS-SUMO-F and Duet-CDS-R.

The *AtFKI* gene in pETDuet-*AtFKI*-IPK was cloned from the *Arabidopsis thaliana* cDNA library using primers Duet-ATFKI-F and ATFKI-IPK-R. The IPK gene was cloned from pETDuet-*SmaThiM*-IPK using primers IK-IPK-F and Duet-1stATG-R.

## Gene sequence

> Sequences encoding *SmDAGK*<sup>1</sup>

```
ATGCCGATGGATCTGCGCGACAACAAACAGTCCCAGAAAAAATGGAAAAACCGC
ACCCTGACCAGTAGTCTGGAATTTGCACTGACCGGTATCTTCACCGCGTTCAAAGA
AGAGCGCAACATGAAAAAACACGCGGTTAGCGCTCTGCTGGCGGTGATTGCGGGT
CTGGTTTTTAAAGTCTCCGTCATTGAGTGGCTGTTTCTGCTGCTGAGCATCTTCCTG
GTCATCACCTTCGAGATCGTCAACAGCGCGATTGAAAACGTCGTCGATCTGGCAA
GCGATTACTTTCAGCATGCTGGCGAAAAACGCCAAAGATATGGCAGCAGGTGC
GGTTCTGGTTATTAGCGGTTTTGACGACTGACCGGTCTGATCATCTTCCTGCTGAA
AATCTGGTTCCTGCTGTTCCACTAA
```

> Sequences encoding *BsThiM*

```
ATGGATGCACAATCAGCAGCAAAATGTCTTACGGCTGTCCGCCGGCATAGCCCCT
GGTGCATAGCATAACCAACAATGTCGTAACGAATTCACAGCAAACGGCCTGCTCG
CGCTCGGCGCATCGCCCGTTATGGCGTACGCAAAAGAAGAGGTCGCCGATATGGC
GAAAATTGCGGGTCACTCGTTTTAAATATCGGAACACTGAGCAAGGAGTCAGTC
GAAGCGATGATCATCGCGGGAAAATCAGCTAATGAACATGGCGTTCCCGTCATTCT
TGATCCTGTCCGTGCCGGAGCAACACCGTTCCGCACTGAATCGGCACGTGACATC
ATTCGTGAGGTGCGCCTTGCTGCAATCAGAGGAAATGCGGCGGAAATTGCCCATAC
CGTCGGCGTGACCGATTGGCTGATCAAAGGTGTTGATGCGGGTGAAGGTGGAGGC
GACATCATCCGGCTGGCTCAGCAGGCGGCACAAAAGCTAAACACGGTCATTGCGA
TAACTGGTGAAGTTGATGTCATAGCCGACACGTACATGTATACACCCTTCATAAC
GGCCACAAGCTGCTGACAAAAGTGACAGGCGCCGGTTGCCTGCTGACTTCCGTCG
TCGGTGCGTTTTGCGCTGTGGAAGAAAATCCATTGTTTGCTGCTATTGCGGCCATTT
CTTCGTATGGGGTTCGCCGCTCAGCTTGCCGCACAGCAGACGGCTGACAAAGGCC
TGGAAGCTTTCAGATTGAATTGCTGAACAAGCTTTCAACTGTTACTGAACAAGAC
GTCCAAGAATGGGCGACTATAGAAAGGGTGA CTGTCTCATGA.
```

> Sequences encoding *EcThiM*<sup>2</sup>

```
ATGCAAGTCGACCTGCTGGGTTCAAGCGCAATCTGCGCACGCGTTACACCTTTTTCA
CCAACATTCCCCTCTTGTGCACTGCATGACCAATGATGTGGTGCAAACCTTTACCG
CCAATACCTTGCTGGCGCTCGGTGCATCGCCAGCGATGGTTATCGAAACCGAAGAG
GCCAGTCAGTTTGCGGCTATCGCCAGTGCCCTTGTTGATTAACGTTGGCACACTGAC
GCAGCCACGCGCTCAGGCGATGCGTGCTGCCGTTGAGCAAGCAAAAAGCTCTCA
```

AACACCCTGGACGCTTGATCCAGTAGCGGTGGGTGCGCTCGATTATCGCCGCCATT  
TTTGTCAATGAACTTTTATCTTTTAAACCGGCAGCGATACGTGGTAATGCTTCGGAAA  
TCATGGCATTAGCTGGCATTGCTAATGGCGGACGGGGAGTGGATAACCACTGACGCC  
GCAGCTAACGCGATACCCGCTGCACAAACACTGGCACGGGAAACTGGCGCAATCG  
TCGTGGTCACTGGCGAGATGGATTATGTTACCGATGGACATCGTATCATTGGTATTC  
ACGGTGGTGATCCGTTAATGACCAAAGTGGTAGGAACTGGCTGTGCATTATCGGGCG  
GTTGTGCTGCCTGCTGTGCGTTACCAGGCGATACGCTGGAAAATGTCGCATCTGC  
CTGTCACTGGATGAAACAAGCCGGAGAACGCGCAGTCGCCAGAAGCGAGGGGCC  
AGGCAGTTTTGTTCCACATTCCTTGATGCGCTCTGGCAATTGACGCAGGAGGTGC  
AGGCATAA

> Sequences encoding *SfPhoN*<sup>3</sup>

ATGTCTATTCCACCAGGTAACGACGTAACACTACAAAGCCAGATTTATATTATTTGACT  
AACGACAACGCTATTGACTCATTAGCCCTTCTTCCGCCGCCACCTCAGATCGGTTTC  
CATTGCCTTCCTTAACGACCAGGCCATGTATGAAAAGGGTCGCTTGTTGCGGAACA  
CTGAGCGGGGTAAGCTCGCTGCTGAGGACGCTAACCTGTCAAGCGGCGGGGTGG  
CGAACGTCTTTAGCGCCGCTTTTCGGCAGCCCAATCACTGCCAAGGATTCCCCAGA  
GCTTCACAAGTTACTGACTAATATGATTGAAGATGCAGGCGATTTGGCGACCCGCT  
CGGCAAAAGAGTACTACATGCGTATCCGCCCATTCGCTTTTTTACGGTGTGAGTACC  
TGTAACACTAAGGAGCAAGACACATTGAGCCGTAATGGCTCTTATCCATCAGGCCA  
TACTAGTATTGGTTGGGCGACAGCCTTGGTGTGTCCGAAATCAATCCGGCACGTC  
AAGACACAATTCTCAAGCGTGGCTACGAATTGGGGGACTCTCGCGTAATCTGTGG  
GTATCACTGGCAGAGCGATGTAGATGCCGCCCGTATTGTTGGTTCAGCTATCGTGG  
CGACATTACATTCTAATCCAGTTTTCCAGGCACAATTACAAAAGCAAAAGACGAA  
TTTGCTAATAACCAGAAGAAGTAA

> Sequences encoding *ScCK*<sup>4</sup>

ATGGTACAAGAATCACGTCCAGGGAGTGTAAGAAGTTACTCGGTCGGTTACCAAG  
CAAGGTCCAGATCGAGTTCTCAAAGAAGACATTCGTTAACACGCCAACGTTCCCTC  
GCAAAGACTGATTAGAACCATCAGTATCGAGTCTGATGTGTCTAATATTACTGACG  
ATGACGATTTGAGAGCTGTCAATGAGGGAGTAGCGGGTGTGCAACTGGACGTCTC  
TGAAACCGCAAATAAGGGACCAAGAAGAGCATCAGCAACTGATGTCACAGATAGT  
TTGGGTTCGACTTCGTCCGAATATATTGAGATTCCTTTGTAAAGGAAACATTGGAT  
GCAAGTTTACCTTCGATTATCTGAAGCAGGACATATTAATCTCATTACAGAGTTTG  
AAGATATCCAAATGGTATAACAACAAGAAAATCCAACCGGTAGCACAAGATATGAA  
CTTAGTCAAGATCTCTGGTGCATGACAAACGCAATTTTCAAAGTTGAATACCCTA

AGTTACCATCGTTGCTATTGAGAATATACGGACCGAATATTGATAATATCATTGACAG  
GGAATATGAATTGCAGATTTTGGCTAGGCTTTCATTGAAAAATATAGGTCCTTCCCT  
TTACGGCTGTTTTGTAAACGGTAGATTTGAGCAGTTTCTGGAGAATTCTAAGACTT  
TAACAAAAGACGACATTAGAACTGGAAGAACTCTCAAAGGATTGCAAGGAGAA  
TGAAGGAGTTACATGTAGGTGTTCCCTCTCTTGAGTTCAGAAAGGAAGAACGGGTC  
GGCTTGTGGCAAAAGATTAACCAGTGGTTGCGCACGATTGAAAAAGTCGACCAA  
TGGGTGGGGGATCCTAAAAACATTGAAAACTCTTTATTATGTGAGAATTGGTCCAA  
GTTTATGGATATTGTTCGATAGATATCACAAGTGGCTTATTTCTCAAGAACAGGGTAT  
AGAGCAAGTCAACAAAAATCTTATATTCTGCCATAATGATGCCCAATACGGCAATTT  
ACTTTTCACTGCTCCTGTGATGAACACACCGAGCCTATACTGCACCTTCGTCTA  
CATCATTGACTTCCCAATCAAGTTCCTTATTTCCCTTCGAGCTCCAATGTCATTGTAG  
ATGATATAATCAACCCGCCAAAGCAGGAGCAAAGCCAAGATTCCAAATTGGTCGTC  
ATTGATTTTGAATATGCAGGTGCCAATCCCGCCGCATATGATTTAGCGAATCATCTTT  
CCGAGTGGATGTATGATTACAACAATGCTAAGGCCCCACATCAGTGCCACGCTGAT  
AGATATCCCGATAAAGAACAGGTTTTGAATTTCTTATACTCTTATGTTTCGCATCTAA  
GGGTGGTGCTAAGGAACCCATAGATGAAGAGGTTCAAAGACTCTATAAGTCAAT  
CATTCAATGGAGACCCACTGTACAACCTATTTTGGTCGCTCTGGGCCATCCTACAAA  
GTGGTAAATTAGAGAAAAAAGAAGCCTCCACTGCCATCACTAGAGAAGAAATTGG  
ACCCAATGGAAAAAATATATCATCAAGACTGAACCCGAATCCCCTGAAGAAGAC  
TTTGTGAAAATGACGACGAGCCTGAAGCTGGCGTCAGCATTGACACGTTTCGATTA  
TATGGCTTATGGTCGTGACAAGATTGCGGTCTTTTGGGGCGACCTTATTGGCTTAGG  
CATAATCACCGAAGAAGAATGCAAAAATTTAGCTCTTTCAAGTTCCTCGATACTA  
GTTATTTGTAA

> Sequences encoding *SpLicA*

ATGGAAGATCATCAAAGAGAAGATTAGCAGCCTGCTGAGCCAAGAAGAAGAA  
GTTCTGAGCGTTGAACAGTTAGGTGGTATGACCAATCAGAATTATCTGGCCAAAAC  
CACCAACAAACAGTACATCGTTAAATTTCTTTGGCAAAGGCACCGAGAACTGATT  
AATCGTCAGGATGAAAAGTACAACCTGGAAGTCTGAAAGATTTAGGTCTGGATG  
TGAAAACTACCTGTTTCGATATTGAAGCCGGTATCAAAGTGAACGAATATATTGAA  
AGCGCGATTACCCTGGATAGCACCAGCATTAAAACCAAATTCGATAAAATCGCACC  
GATCCTGCAAACCATTACATACCAGCGCAAAGAAGTGCCTGGTGAATTTGCACCGT  
TTGAAGAGATCAAAAAATACGAAAGCCTGATCGAAGAACAATCCCGTATGCAAA  
TTATGAAAGCGTTCGTAATGCAGTGTTGAGCCTGGAAAAACGTCTGGCCGATCTGG  
GTGTTGATCGTAAAAGCTGTCATATTGATCTGGTGCCGAAAACCTTATTGAAAGT  
CCGCAGGGTCTGCTGTATCTGATTGATTGGGAATATAGCAGCATGAATGATCCGATG  
TGGGATTTAGCAGCACTGTTTCTGGAAAGCGAATTTACCAGTCAAGAAGAGGAAA

CCTTTCTGAGCCATTATGAGAGCGATCAGACACCGGTTAGCCATGAAAAAATTGCC  
ATCTACAAAATCCTGCAAGACACCATTTGGAGCCTGTGGACGTTTATAAAGAAGA  
ACAGGGCGAAGATTTTGGTGATTATGGTGTTAATCGTTATCAGCGTGCAGTTAAAG  
GTCTGGCAAGCTATGGTGGTAGTGATGAAAAATAA

> Sequences encoding *Bce*ThiM

ATGAATATGAAAGAAATTAGTAAAGTAGTGGATTTGGTGAGAGAATCTAATCCGCT  
TGTTCATAATATTACAAATGTTGTTGTAACAAATTTTACTGCTAACGGTTTGTGGC  
ACTTGGGGCATCGCCTGTAATGGCGTATGCAAAGAAGAAGTGGCAGAAATGGCT  
AGCATTGCTGGAGCGTTAGTATTAATATGGGAACACTTCGTCCTGAAGAAGTAGA  
AGCGATGTTACTTGCCGGTAAATCAGCAAATGTGAACAATGTACCAGTACTGTTTG  
ATCCAGTTGGTGCAGGAGCAACATCGTATCGGACAGAAGTTGCGAGACATATTCCG  
GCTGAAATTGAATTAGCGAGTATTCGCGGAAATGCAGCTGAAATAGCGAACGTTAT  
TAATGAGAGATGGGAAATTAAGGGGTAGACGCTGGTACTGGAATGGCAATGTT  
GTAAGTATTGCAAGGCAGGCAGCAGATGAACTAAATACAGTTGCGGTCATTACTGG  
AAAAGAAGATGTTGTTACAGATGGAGAGAGA ACTATTGTTATTCGAAATGGTCACC  
CTATTTAACGAAAGTTACGGGAACAGGTTGTTTACTAACTTCTGTAATAGGAGCAT  
TTGTAGCAGTGGAAAAAGATTATGTAAGCAGCAGTAGCAGCATTAAACGTTTAT  
GGTGTAGCTTCGGAACCTGGCAGCTGCTAAGACCGTGGAAAAGGGACCTGGTAGTT  
TCCAAATTGAATTTTAAATCAGTTAGCGAATACTACTTCTAGTGATATTGAGAAGT  
ATGGAAAGATTGAGGAGTTAGAGTAA

> Sequences encoding *Bli*ThiM

ATGAATATGGAAGATGCCGCAAGGGGAATTGAGTTAGTCAGAAAGCAAAAACCGC  
TCGTACACAATATGACAAACAATGTCGTCACCAACTTTACGGCAAACGGTTTGCTG  
GCTCTCGGCGCATCGCCGGTGATGGCGTATGCGAGGGAAGAGGGCCGCGACATGG  
CAAAGATCGCCGGAGCCCTTGTGCTGAACATCGGCACGCTCAGCCGTGAATCTGT  
TGAAGCGATGATTATTGCAGGAAAGTCAGCTAATGAACATGGGGTGCCGGTTATTT  
TTGATCCGGTCCGGTGCGGGGGCGACCGGTTTCGAACGGAATCGGCTCAAGCGAT  
CATGCGCAAAGTGAAGGTTTCTGCCGTGAGAGGCAATGCTGCGGAAATTGCCAAC  
ACGCTTGGGGAAGACTGGCTGATCAAAGGCGTGGACGCGGGTGAAGAGAGCGGC  
GACAGAACGGAGCTCGCAAAAAAGCCGCGAAATTATGGGATACAGCAGTCATCA  
TAACCGGTGCTGAAGACGTGATAACGGATGGTACAAAACGTATAACCGTGGGCAA  
CGGACATCAGCTGCTTACGAAAGTGACGGGGACAGGCTGCTTGTTTACCTCTGTC  
ATCGGTGCGTTTTGCGCCGTTGAAAAAGACGTTTGCCGTGCCGCTGTATCTGCAGC  
CGTTTTTATGGAACAGCGGCCGAGTTGGCCGCGGCGAAAACGGAAAGCCGGGG

GCCCCGGAAGTTTCCAAATCGAGTTTTTTGAATCAGCTTGCTGCCGTTGAAGCTATGG  
ATATAAAGAACGCGGCAGGATCAGAGAGGTGGAATAA

> Sequences encoding *Cbu*ThiM

ATGAATATAGATATAGCACAAAAGGTAGTAGAGCTATTAAACAGATTA AAAAATAA  
AAAACCATTGATT CATAACATAACTAATTATGTTACAGTAAATGATTGTGCTAATATA  
CTTCTTGCAATAGGTGCATCACCAATAATGGCGGATGACTTAAAAGAAGCAGAAG  
ATATTACATCAATTGCATCAGCACTTGT AATAAATATTGGA ACTTTAAATGAAAGAA  
CTATAGAATCAATGATTGCATCAGGGAAAAAGGCTAATGAATTGAATATTCCCGTTG  
TACTAGATCCGGTTGGAGCGGGTGCATCATTATTTAGAAATGAAACA ACTAAAAGA  
ATTCTTGAAGAAATAAAAATCAGTGTTTTACGTGGAAATATGTCGGAAATAAAATTT  
ATTGCTGGATTAGAGTCTGAAACAAAGGGTGTGGATGCATCAGAGTCAGATTTAAA  
AAGTGATAGTGATGAAGGCATAAGAGTAGCTAAATATTTAGCAAAAAGATTTAATT  
GTACAGTAGCTATAACTGGAGTATGTGATATAGTTTCTGATGGAGAAAATCTGTTA  
CCATAGAAAATGGAACAAAATGCTTTCTAATGTTACAGGGACTGGATGTATGACC  
ACAGCTTTAGTTGGTGGGTATTTAGGAGCTTACGAAACAAAAGAAGATTTATTTAT  
AGCTGCTGTTTCAGGAATAGTATCTATGGGAATCTGTGGAGAAATTGCAGAAGAAA  
GAGCTGGAAGTATAGGTCTTGGAAAGTTTTCATATGGCAATAATAGATGCAGTAAGT  
AATTTAGATGAAGAAGATTTGCTAAAAGAAGTAAAATTAATAA

> Sequences encoding *Ehu*ThiM

ATGCAGCCTGACCTGCTCGATCTACACGTTTTACATCAGTTCCGAACCCGTTCCCC  
GCTTACCCACTGTATGACTAACAATGTCGTACAAACCTTTACCGCCAATGTCCTGCT  
CGCACTTGGCGCCTCGCCGGCGATGGT GATTGAAGCCGAAGAAGCCGAACAGTTT  
GCGACGCTTGCCGATGCGCTGCTGATCAACGTCGGTACGCTGACCGCACCGCGCG  
CCCAGTCGATGCGTCGGCAATAGAAAGTGCGGTGGCGGCAGGCAAACCTGGA  
CGCTCGATCCGGTTGCCGTTGGCGCGCTCGCCTTTTCGCACCCGCTTTTGT CATCAA  
ATTCTCTCCCTTAAGCCTGCCGCAATTCGTGGTAACGCCTCGGAAATTCTCGCCCTT  
GCAGGGATGAGCGCGGGCGGTGCGGGCGTAGATACAACCGATACGGCGGCCAGC  
GCGCTGCCTGCCGCCAGGCACTGGCGCGCCAGATCAACGCCATTGTGGTGGTAA  
CCGGCGAGGTGGATTACATCACCGACGGGCAGAGAACCCGCACCGTATCGGGGGG  
CGATCCGATAATGACCCGCGTTGTGCGGCACAGGCTGCGCGCTCTCCGCCGTCGTTG  
CGGCCTGCTGTTGCTGCCCGGCGACCGGCTGGATAATATCGCCGCCGCTGCGGA  
TGATAAAGCGTGCCGGTACGGTCGCCGTGGCGCACTCCCGCGGTCCCGGCAGCT  
TCGCCAGCGGTTTTCTGGACGCGCTTTATACGCTGGAGGAGCAGGCATGA

> Sequences encoding *Sma*ThiM

ATGATCGCTCGACCTGATGCTCTACCCGGCGCCCCGCGCCGCGGCCTGTCTGACCCA  
ATTCCAACAGCGGCCTCCGCTGATCCACTGCCTGACCAACGAAGTGGTGCAGTCG  
CTGACTGCCAACGTGCTGCTGGCGCTCGGCGCCTCCCCGGCGATGGTGGTGGAGC  
CGCAAGAGGGCGGCGCAGTTCAGCGCGCTTGCCGACGGCCTGCTGATCAACGTGCG  
TACCCTCAACGCGCTGCGCGCCGAATCGATGCGGGCGGCGGTGGCCGCCGCCAAT  
CAGGCCGGCAAGCCCTGGACGCTGGATCCGGTGGCGGTGCGGCGCTCTCCTACC  
GTACCGCCTTCGCCAACAGCTGCTGGACGAAAAACCGGCGGCGATACGCGGCA  
ACGCCTCGGAAATCATGGCGCTCAACGGGTTGCTGGCCAGCGGCCGCGGCGTGGA  
CAGCGGCGACGATTCCCTGGCGGCATTGCCCGCCGCGCGTGAGCTGGCGCGGCGC  
AGCGGCGCGGTGGTGGCGGTACCGGCGCGGTGGATTACGTCACCGACGGCCAA  
CGCGACTGGGCGATAGAAGGCGGCTCCCCGCTGATGACGCGGGTGGTGGGCACC  
GGCTGCGCGCTGTCGGCGGTGGCGGCGGCGTTTTGCGCCCTGCCGGGCGATCGCC  
TGGACAACGTGGCGACCGCCTGTCGGGTGATGTCACACTGCGGCGGCCTGGCGGC  
CAGGCAGGCCCGCGGGCCGGGCAGCTTTACGCCGGCGTTCCTCGACGCCCTGTAT  
CAACTGCGCGGAGAGGATCTGTGA

> Sequences encoding *Gst*ThiM

ATGGCCGATTGGCGTGAATGGGCGGAACTGCGCGAGCGGGTGAGAGAGGCCAAT  
CCGCTCGTCCACAATATGACGAATGTCGTCGTGACGAATTTTACGGCGAACGGATT  
GCTGGCGCTTGGCGCTTCGCCGGTGATGGCGTATGCGAAAGAGGAAGTGGCAGAG  
ATGGCGAAGCTTGCCGGCGCGCTCGTATTGAACATCGGGACGCTGAACGCTGAGG  
AAGTAGAGGGCGATGTTGATCGCCGGCCGGGCGGCGAACGAAGCCGGTGTGCCGG  
TGGTGTTCGACCCGGTTCGGAGCCGGGGCCACGCGCTATCGAACGGAGACAGCGC  
GCCGCATCGCCGAACAGGTGAAGCTTGCAGCGGTCCGCGGCAATGCGGCGGAAAT  
CGCCAATATGATCGGCGAGACGTGGGCGATTAAAGGCGTCGACGCCGGGGAAGGA  
AGCGGCGATGCCGCGGCTTTGGCGAAGCGGGCGGCGGCCAAGCTTGGCACCGTT  
GTGATCATCACCGGAAAGGACGATGTCGTCACGGACGGAAACACGACGTATTTGG  
TTCACAACGGCCACCCGCTGTTGACGAAAGTGACCGGGACGGGCTGTTTGTGAC  
GTCGGTGATTGGGGCGTTTGCCGCTGTTGAGCGTGATATGGTGAAGGCAGCGGTG  
GCGGCGCTCGCCTATTATGGCGTCGCGGCGGAGCGGGCGGCTGCAGAAGCTGGGG  
AGCGCAGTCCGGGCCGTTTTTCAGTCGTTGTTTCTAGACGCGTTGGCGCACACAAG  
CGCCGATGATGTGAAGCGTGACGGACAGGTGGAACAACGGTAA

> Sequences encoding *StyThiM*

ATGCAGCCTGACCTGCACTGCCGCACGCTTGCGGCGCATAACGTAAAAACACTTTCG  
CGCGCTCTCCCCGCTTACGCACTGTATGACGAATGACGTCGTACAAACGTTTACCG  
CCAATACGTTGCTGGCGCTGGGCGCTTCACCCGCCATGGTGATTGATCCTGTGAG  
GCCAGACCGTTTGCCGCCATCGCCAACGCCTTGCTGATTAATGTCGGAACATTAAC  
TGCCTCACGCGCTGACGCGATGCGTGCGGGCGGTAGAAAGCGCTTATGATGCCAAA  
ACGCCGTGGACGCTTGATCCTGTCGCGGTGGGCGCGCTGGAATTTTCGTCGGCGATT  
TTGCCTGGATCTTTGTCCCTGCGCCCGGCGGCAATACGCGGCAACGCCTCGGAA  
ATCCTGGCGTTATCCGGCATGGCGCTGGGCGGACGTGGCGTAGATAACCACCGAGG  
CGGCGTTGGCCGCACTGCCTGCGGCGCAGGCGCTGGCGCGTCAGATAGACTGCAT  
CGTTGTGGTTACCGGAGAGATAGATTACGTCACTAATGGTCAGCGCACGCTGAGCA  
TTCCCGGCGGCGATCCGTTAATGACTCGCATTGTAGGCACCGGCTGCGCGTTGTCG  
GCGGTCGTCGCCGCCAGTTGCGCGTTACCGGGCGCCGCGCTGGACAATGTCGCGT  
CGGCCTGCTGCTGGATGAAACTGGCTGGACAGGCCGCGGCAGAGCGTAGCGAAG  
GACCGGGTAGCTTCATCCCGCTTTTCTTGATGCGCTCTATCATCTGGATGTGGAGG  
CGGCCAATGCAACGAATTA

> Sequences encoding *MiPK*

ATGATTATTCTGAAACTTGGTGGTAGCGTTATTACCCGTAAAGATAGCGAAGAACC  
GGCAATTGATCGTGATAATCTGGAACGTATTGCAAGCGAAATTGGTAATGCAAGCC  
CGAGCAGCCTGATGATTGTTTCATGGTGCAGGTAGCTTTGGTCATCCGTTTGGCCGT  
GAATATCGTATTGGTTCCGAAATTGAAAACGAAGAGGATCTGCGTCGTCGTCGTTT  
TGGTTTTGCACTGACCCAGAATTGGGTGAAAAAACTGAATAGCCATGTTTGTGATG  
CACTGCTGGCAGAAGGTATTCCGGCAGTTAGCATGCAGCCGAGCGCATTATTCGT  
GCACATGCAGGTCGTATTAGCCATGCAGATATTAGCCTGATTCGTAGCTATCTGGAA  
GAAGGCATGGTTCCGGTTGTTTATGGTGATGTTGTTCTGGATAGCGATCGTCGTCG  
AAATTTAGCGTGATTAGCGGTGATCAACTGATCAATCATTTTAGCCTGCGTCTGATG  
CCGGAACGTGTTATTCTGGGCACCGATGTTGATGGTGTATAACCCGTAATCCGAAA  
AAACATCCTGATGCACGTCTGCTGGATGTTATTGGTAGCCTGGATGATCTGGAAAG  
TCTGGATGGCACCTGAATACCGATGTTACCGGTGGTATGGTTGGCAAATTCGTG  
AACTGCTGCTGCTGGCCGAAAAGGTGTTGAAAGCGAAATCATTAATGCAGCCGT  
TCCGGGTAATATTGAACGTGCCCTGCTGGGTGAAGAAGTTCGCGGTACACGTATTA  
CAGGTAAACACTAA

> Sequences encoding *TcNudix*

ATGGCGATGACAGTTGGTTTAGGAACTCGTGGGATCTCATTAGTTGTGGATCGCGG  
TCTAACCTCGGGGAAGAATGCTAAATCATCGCAAACCTGTTTACAAATGCATTAATTC  
GTCTCAACAGCGTTGTGTTATGCGACCCGTTAAGTCCTTGATGAAGATTGTTGAAC  
AAAACAAGGAACGAGCATTTTCTCAAATCGTTCGATCTTTCAAACTTCGGATACT  
AGACTAATAGATGTGGAAGCATCATCTGTGGAGAATGCCGCAAAGTCTCGAGTGC  
CAGAGGTTGGGGTTACGGTGTTCATAGTAAAAGACGACAAGATACTACTAGGACG  
TCGCGGCTCAACACTCGTTGTTGGCAACAGTTTTCACCTCCCTGGCGGACACCTTG  
AGTACGGGGAAAGTTTTGAGGAATGTGCAACAAGAGAAGTGAAGGAGGAAACAG  
GACTAGACATAAATAATTTAAAGGTGGTAACAATAGTCAACCATGTCCTTGCTGATA  
TACATGCTGTTGTTGTTTACATGCGCGCAAATTTATCAGACCCAAATCAGACGCCG  
CAAACCTATTGAACCTCAAAGGTGTGAAGGATGGGATTGGTATGACTTGGAAAACC  
TACCCGAACCAATGTTTCAACCATTGAAAGAATTGCTACAAGCTGGTAGTTTCAAT  
ATTTTCACTACTCATTCTTGA

> Sequences encoding *TcCDS*

ATGACTACGACATTGAGCAGCAATCTGGACTCACAATTCATGCAAGTTTATGAGAC  
TTTGAAATCTGAGCTGATTCATGACCCGTCATTTGAGTTTGATGACGATTCTCGTCA  
GTGGGTGGAGCGTATGATTGACTACAATGTACCTGGTGGTAAGATGGTCCGTGGCT  
ATTCTGTTGTTGACAGCTACCAATTGCTTAAAGGTGAAGAATTGACGGAAGATGAA  
GCTTTTCTCGCGTGTGCTCTGGGTGGTGCCTGAATGGCTGCAAGCCTTTATTCT  
GGTCTGGATGACATTATGGATGGCTCGCACACACGTCGTGGTCAACCCTGTTGGT  
TTCGTCTGCCCAGGTTGGTGTAGTTGCTATTAATGATGGTGTCTGCTGCGCAACC  
ATGTGCATCGCATCCTGAAGAAATATTTCCAAGGTAAGCCTTATTACGTGCATCTTC  
TGGACCTCTTCAATGAGACCGAATTTCAAACAATCTCTGGCCAAATGATTGATACA  
ATCTGTCGTCTGGCTGGCCAAAAAGATCTCTCAAAGTATACTATGACTCTTAACCGT  
CGCATTGTTCAGTACAAAGGTTCTTACTACTCATGTTACCTGCCAATTGCGTGTGCA  
CTGCTGATGTTTGGAGAGAATCTGGAAGATCATGTTCAAGTGAAGACATCCTTGT  
AGAATTGGGTATGTATTATCAAATTCAGAATGATTATCTCGACACTTTTGGTGATCCT  
GATGTTTTTGGCAAGACGGGTACAGATATTGAAGAATGCAAGTGTTTCATGGTTGAT  
TGCAAAAGCACTGGAACCTGCCAACGAGGAACAAAAGAAAATTTTAAGCGAAAA  
CTATGGGATCAACGATCCATCAAAGGTAGCAAAAGTGAAGGAATTATACCATGCTC  
TGGATCTGAAGGGTGCATGATGAAGATTATGAGACAAATCTGTATGAGACGTCAATG  
ACATCAATTAAGCTCATCAAACATTGCAGTGCAAGCGGTGTTGAAATCTTGTCT  
GGAAAAGATGTATAAGGGACATAAGTAA

> Highly codon-optimized sequences encoding *TcADH2*

ATGAGCCTGAACACCCCGGATGTGATTATTTGCAAAGCGGCGGTGGTGCGCGAAC  
TGGGCCCGCAGCGTGATGGTTGAAGAAATTAAGTGGATCCGCCGAAAGCGACCGA  
AGTGCGCATCAAAATGCTGTTTTCGAGCATCTGCCACACCGATATGCTGTGCTTTG  
ATGGCTTTCGACCCCGCTGTTTCCGCGCATTCCGGGCCATGAAGGTGTTGGCATG  
GTGGAAAGCGTGGGCGAAGATATTAACCAAGCTGAAACCAGGCGATATCGTGA  
TGCCGCTGTTTATGGGCGAATGCGGCCAGTGCCTGAACTGCAAAGCAAACGCAC  
CAACCTGTGCCATGCGTATCCGCTGACCCTGAGCGGCCTGCTGTTAGATGGCACCA  
GCCGCATGAGCATTGCGAAAACCGAAGAAACCATTTATCATCACCTGAGCTGCAG  
CACCTGGAGCGAATACATGGTGATTGATATCAACTACGTGCTGAAAATTGACCCGA  
AAATGCACCTGCCGTATGCGAGCTTCTGAGCTGCGGCTTACCACCGGCTTTGGC  
GCGCCGTGGAAAGAGACCCAGATTACCAAAGGCAGCATTGTGGCGGTGTTTGGCC  
TGGGCGCGGTGGGCTTAGGTGCAATTAAGGTGCGCAGATGCAGGGCGCGAGCAT  
TATTATTGGCGTGGATATTAACGAAAACAAAGCGGCGAAAGGCAAAGCGTTTGGC  
ATGACCCACTTCATTAACCCGAAAGATCATCCGAACCAGCTGGTGAGCGATATGGT  
GCGCGATATTACCGATGGCCTGGGCGTGGATTATTGCTTTGAATGCACCGGCATTGC  
GAGCCTGCTGAAAGAGATCATCGAAGCGAGCAAATTTGGCTTTGGCACCACCATT  
CTGATTGGCGCGGCGCCGATAACGTGCCGATTAGCAGCCTGAGCCTGATTAACGG  
CCGCACCCTGAAAGGCACCACCTTTGGCGGTGTTTCGTAICTGCTCTGATCTGCCGA  
TCATTCTGCAGAAATGCATGAACGAAGAAATTGAGCTGGATGAGCTGATGAGCCAT  
GAAATCCGCCTGGAAAACATCCATGAAATTTTCGAGATTCTGAAAAGCCGGACT  
GCGTGAAGATCCTGATTAACCTTTGAT

> Moderately codon-optimized sequences encoding *TcADH2* (*TcADH2*<sub>low</sub>)

ATGTCCTTAAACACTCCGGATGTTATCATTTGTAAAGCTGCAGTAGTACGTGAGCTT  
GGCCGCTCGGTGATGGTAGAAGAGATTAAGGTAGATCCACCAAAGCAACCGAAG  
TGCATCAAGATGTTGTTTCGCTAGCATTGTCATACCGACATGTTATGCTTCGATG  
GCTTTCCTACTCCTTTGTTTCCTCGTATTCCTGGTCATGAAGGTGTCGGGATGGTTG  
AGAGTGTCGGGGAAGACATTAACAAAGTTGAAACCAGGAGACATCGTGATGC  
CCCTCTTATGGGTGAATGTGGTCAATGCTTAAATTGTAAATCTAAACGTACCAATT  
TGTGTCATGCTTACCCTCTGACACTCAGTGGCCTTTTGTGCTGACGGCACTTCTCGC  
ATGTCCATTGCTAAAACCGAAGAACTATTTATCACCATTAAGTTGTTCCACATGG  
TCCGAGTACATGGTTATTGACATCAACTATGTAICTGAAAATTGACCCCAAATGCAT  
CTCCCTTATGCTAGTTTCTCTCATGTGGTTTTCACGACTGGCTTTGGTGCTCCATGG  
AAAGAACTCAAATCACTAAAGGTTTCGATTGTAGCTGTTTTTGGCCTGGGTGCCGT  
TGGACTGGGGGCAATCAAAGGGGCACAAATGCAAGGGGCTTCCATCATCATTGGA  
GTAGACATCAATGAAAACAAGGCGGCTAAAGGTAAGGCGTTTGGGATGACACATT

TCATCAACCCTAAGGACCATCCTAATCAATTAGTCTCGGATATGGTGC GTGATATCA  
CTGATGGTTTAGGCGTTGACTACTGCTTCGAGTGCACAGGAATCGCCTCATTGTTG  
AAAGAAATCATTGAAGCCTCTAAAATTGGTTTTGGTACCACAATCTTAATTGGAGC  
TGCTCCAGATAACGTTCCAATTAGTAGCCTATCGCTGATTAATGGTTCGCACTTTAAA  
GGGTACAACTTTTGGTGGTGTACGTACACGCTCTGATCTGCCAATCATTCTTCAAA  
AATGTATGAATGAGGAGATTGAACTGGATGAACTTATGTCACATGAAATTCGCTTG  
GAGAATATACATGAAATCTTTGAGATCTTGAAGAAGCCTGACTGCGTCAAGATTCT  
TATCAACTTTGATTGA

> Sequences encoding *Tc*ALDH

ATGAGTTCAGGAGCTAATGGAAATTCTAAATCTTTAGCTTATGACATCAAGTTCACA  
AAGCTCTTCATCAATGGCGAATTTGTAGACTCAATATCAGGAAGCACATTTGAGAC  
GATAGATCCAGCAACAGAGGAAGTATTAGCAACTGTGGCTGAAGGGAGAGAGGA  
AGACGTTGATCTGGCCGTCAAGGCTGCACGTGAAGCTTTCGACAATGGACCCTGG  
CCTCGTTTATCTGGCGAGGCACGTCCGAAGATTCTCTTAAAATTTGCTGACTTAATC  
GAGGAAAATGCTGATGAAATAGCAACCCTAGAAGTAATCGACACAGGAAAGCCGT  
TTCAAATAGCAAGGTACGTTGAAAACCTCATGGACGTCAGAAACATTCCGCTACTTT  
GCTGGTGCAGCCGATAAAATCCGTGGAGCCACTCTAAAATGTCTAGTGATTTTCA  
AGCTTACACGTTACGCGAACCAATCGGTGTAGTTGGACACATCATTCCCTGGAATG  
CCCCTGCCTATTTATTTGCCATGAAAGTCGCGCCAGCTTTAGCAGCTGGGTGCACC  
GTGGTAATCAAGCCAGCTGAAAACACGCCTCTTGTGGGTCTCTTTATGGCTTACTT  
GTCTAAACTGGCCGGTGTTCCTGATGGGGTAATTAACGTGGTCAATGGGTTCGGAA  
GCACGGCTGGTGTGCGTTAGCTCTCATATGGATATTGACGCGGTTACTTTTACGG  
GTTCAACCAAAGTTGGACGTACCATAATGCAAGCCGCGGCAGCAAGCAATCTGAA  
ACCTGTATCACTCGAATTGGGAGGAAAATCACCTTTTATTGTATTTGATGATGCAGA  
TATTGAAAAAGCCGCAGAGATTGCTGTTTTGGGAGTTCTATCGAATAAAGGTGAAT  
TGTGCGTGCCAGGATCTCGTGTGTTTGTACACGAAGGAATTTATGATGCTTTTGTG  
AAGAAACTGGAAGCAACGGTAAAAATTGGGCAACAGGAGACCGTTTTGATGCC  
GCCACTCGTCATGGTCCTCAGAATAACAAACAACAATACGAAAAAGTTCTTTCGTA  
CATTGAGCTTGGCAAGAAGGAAGGTGCAACTTTGGTAACTGGTGGCAAGCCGTTT  
GGAAATAAAGGATACTACATCGAGCCGACTTTATTCACGAACGTTACGGATGAAAT  
GACCATAGCAAAGGAAGAAATATTTGGCCCTGTTATAATGGTCCTCAAATCAAGA  
CCATTGAAGAAGTGATAAGAAGAGCAAATGCCACAACATATGGACTTGCGGCAGG  
TATAATGACGAAAAATATCGACATTGCAAACACAGTTACAAGATCTATTTCGAGCTG  
GCTCGGTATGGGTCAACTGTTATCTTGCCTTGACCGGGATACACCTTTTGGAGGA  
TACAAAATGAGTGGGTTCGGAAAGAGAACAAGGATTGGAGGCACTTGAACATTATC  
TTCAGGTTAAGACCGTGACTACCCCATATACAATTCTCCATGGCTCTAG

## Supporting Tables

**Table S1** Kinetic parameters of *TcADH2* catalytic oxidation of **1** and **3**

| Substrate | $k_{cat}$ (s <sup>-1</sup> ) | $K_m$ (μM)         | $K_i$ (μM)         | $k_{cat}/K_m$ (μM <sup>-1</sup> ·s <sup>-1</sup> ) |
|-----------|------------------------------|--------------------|--------------------|----------------------------------------------------|
| <b>1</b>  | $6.21 \times 10^{-1}$        | $7.56 \times 10^2$ | $5.86 \times 10^3$ | $8.21 \times 10^{-4}$                              |
| <b>3</b>  | $2.73 \times 10^{-1}$        | $1.07 \times 10^2$ | $1.55 \times 10^3$ | $2.56 \times 10^{-3}$                              |

**Table S2** Kinetic parameters of *EcThiM* and *SmaThiM* catalytic phosphorylation of **1**

| Enzyme         | $k_{cat}$ (s <sup>-1</sup> ) | $K_m$ (mM) | $k_{cat}/K_m$ (μM <sup>-1</sup> ·s <sup>-1</sup> ) |
|----------------|------------------------------|------------|----------------------------------------------------|
| <i>EcThiM</i>  | $5.70 \times 10^{-2}$        | 10.61      | $5.37 \times 10^{-6}$                              |
| <i>SmaThiM</i> | $1.21 \times 10^{-1}$        | 13.07      | $9.26 \times 10^{-6}$                              |

## Supporting Figures

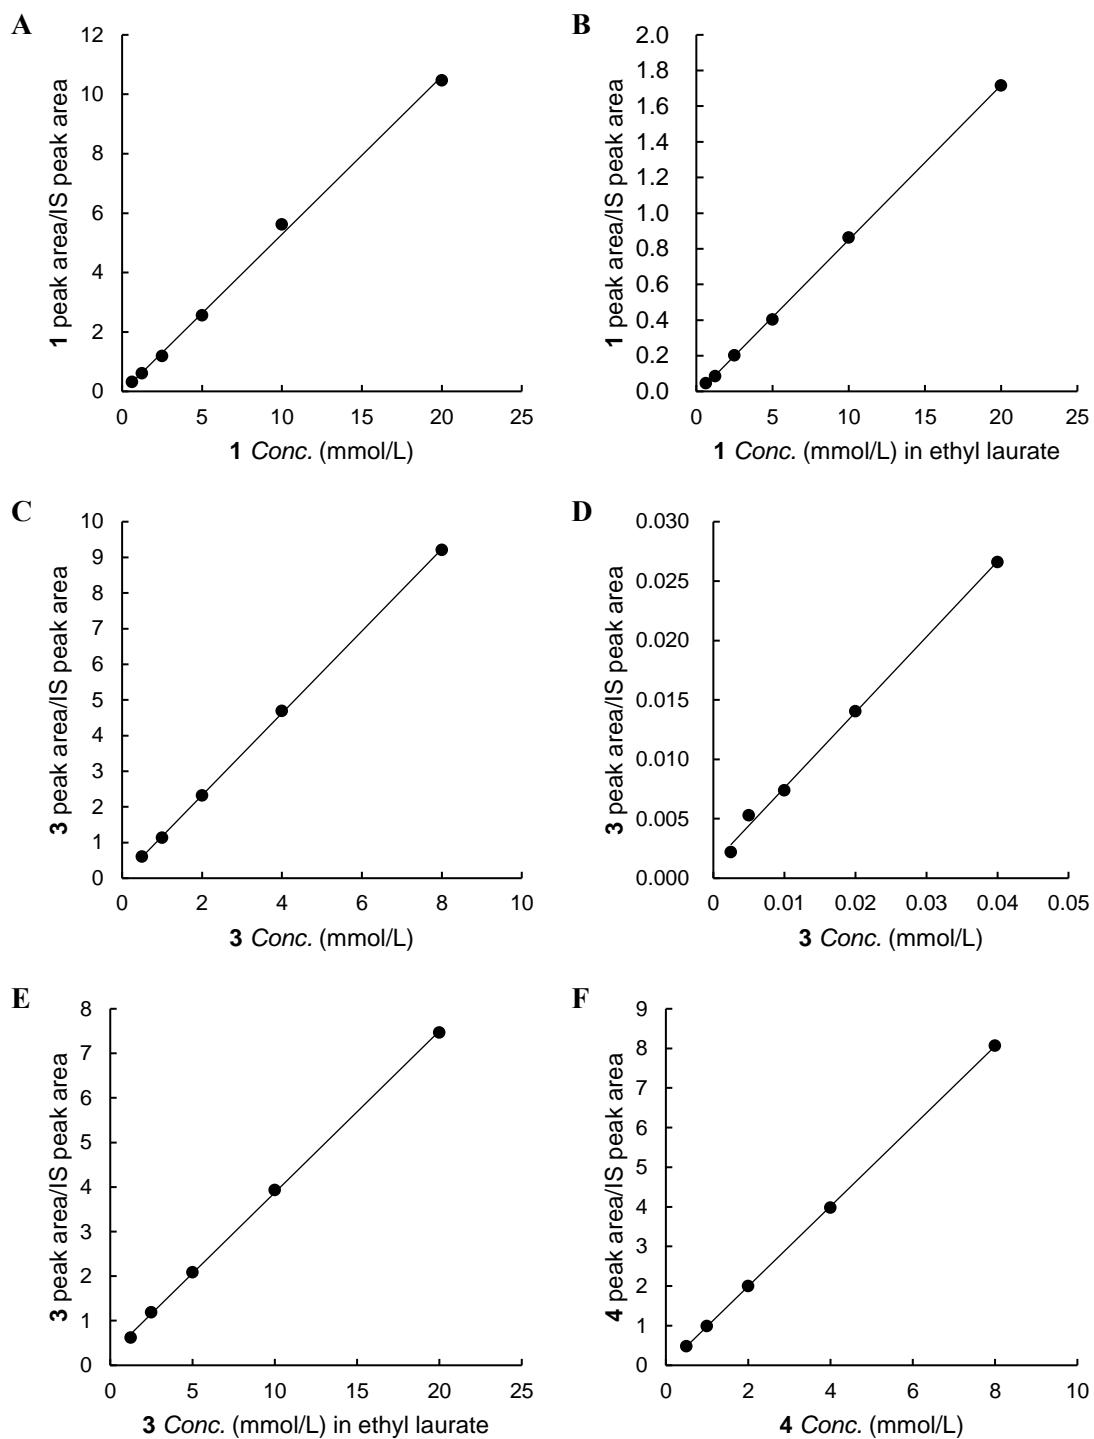

**Fig. S1**  $A_p/A_{IS-p}$  Conc. standard curves of 1, 3, 4. (A) standard curves of 1; (B) standard curves of 1 in ethyl laurate; (C) standard curves of 3; (D) standard curves of 3 in the low-concentration range; (E) standard curves of 3 in ethyl laurate; (F) standard curves of 4.

A

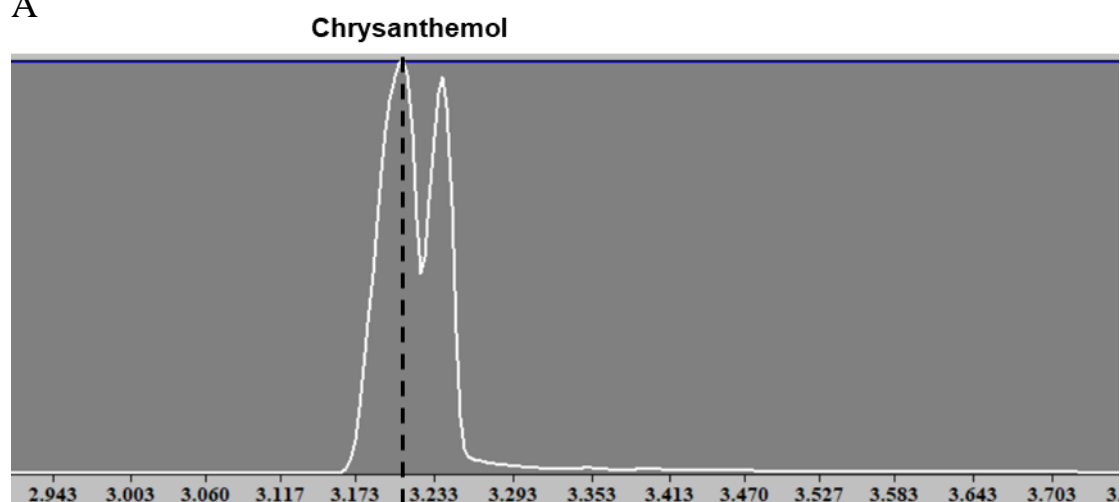

B

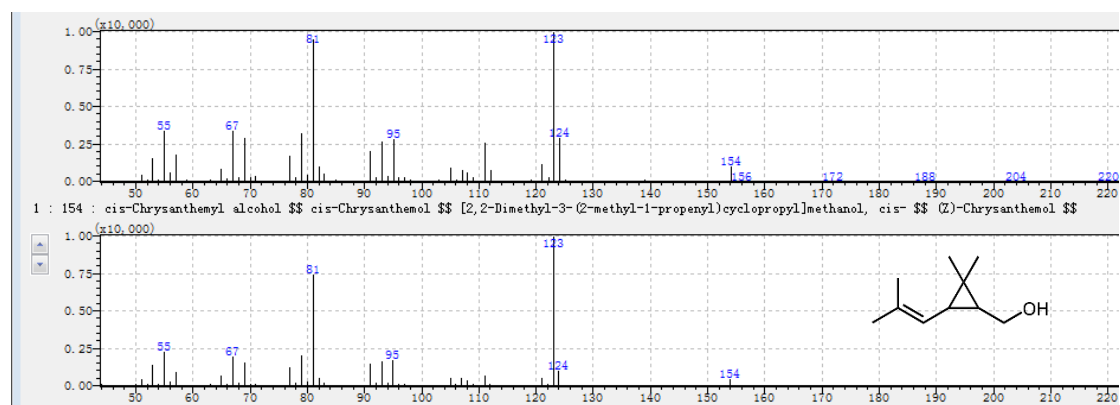

**Fig. S2** GC-MS analysis of chrysanthemol **3** standard. (A) GC analysis of chrysanthemol standard; (B) Mass spectra are shown for the experimental sample (upper panel) and the standard chrysanthemol from the NIST database (lower panel).

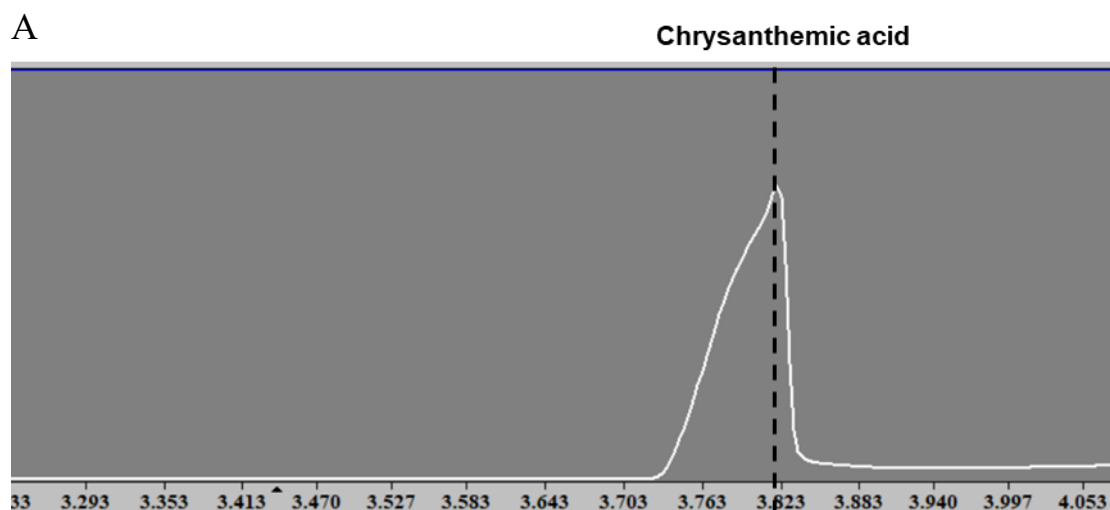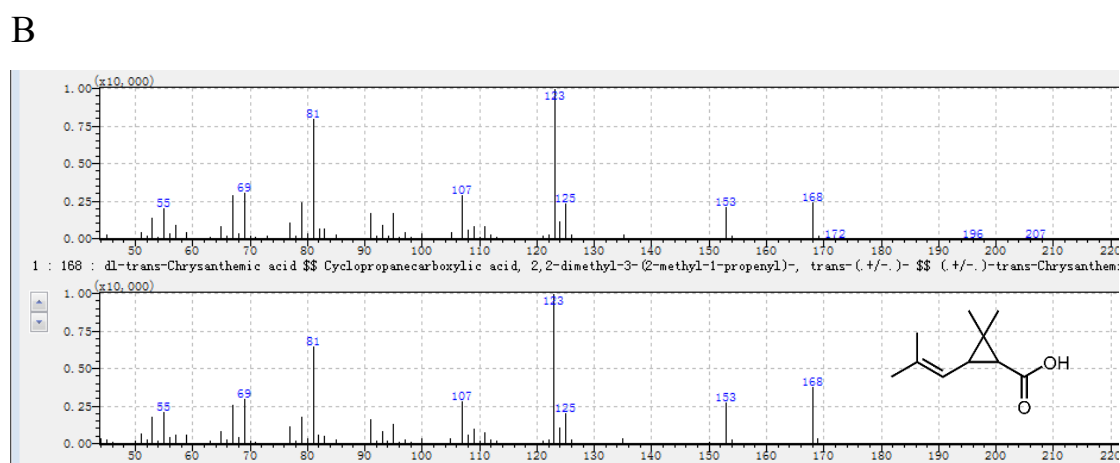

**Fig. S3** GC-MS analysis of chrysanthemic acid **4** standard. (A) GC analysis of chrysanthemic acid standard; (B) Mass spectra are shown for the experimental sample (upper panel) and the standard chrysanthemic acid from the NIST database (lower panel).

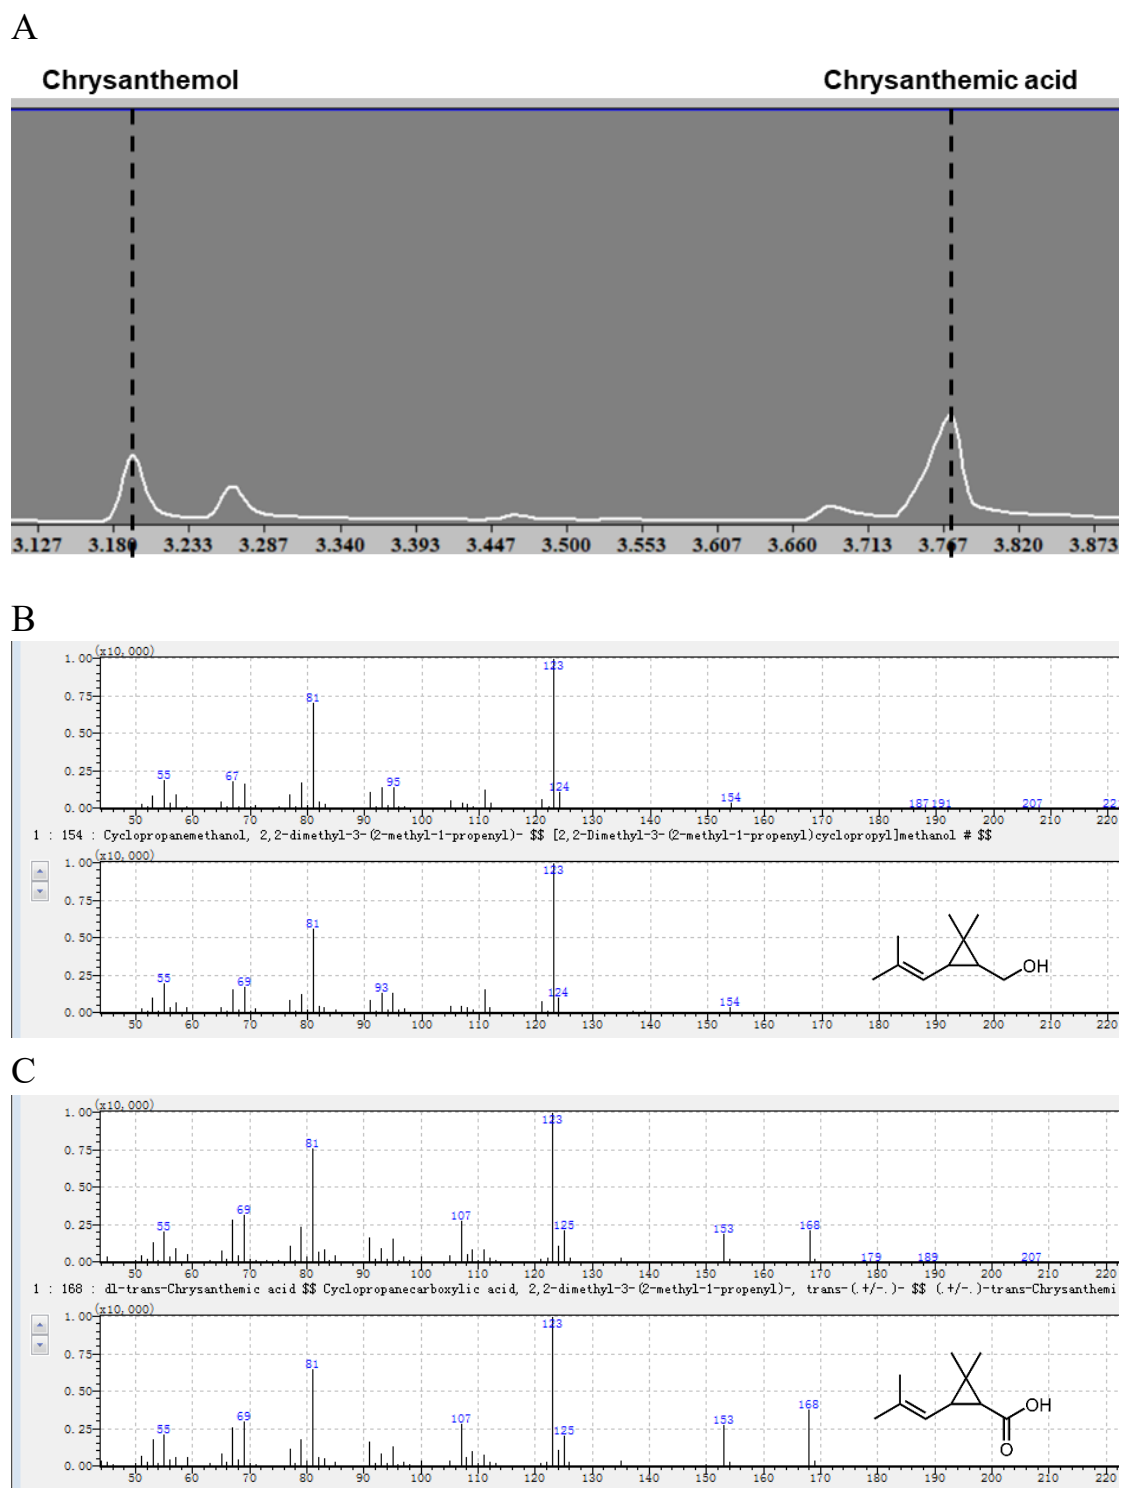

**Fig. S4** GC-MS analysis of product **3** and **4**. (A) GC analysis of product sample; (B) Mass spectra are shown for the chrysanthemol peak (upper panel) and the standard chrysanthemol from the NIST database (lower panel); (C) Mass spectra are shown for the chrysanthenic acid peak (upper panel) and the standard chrysanthenic acid from the NIST database (lower panel).



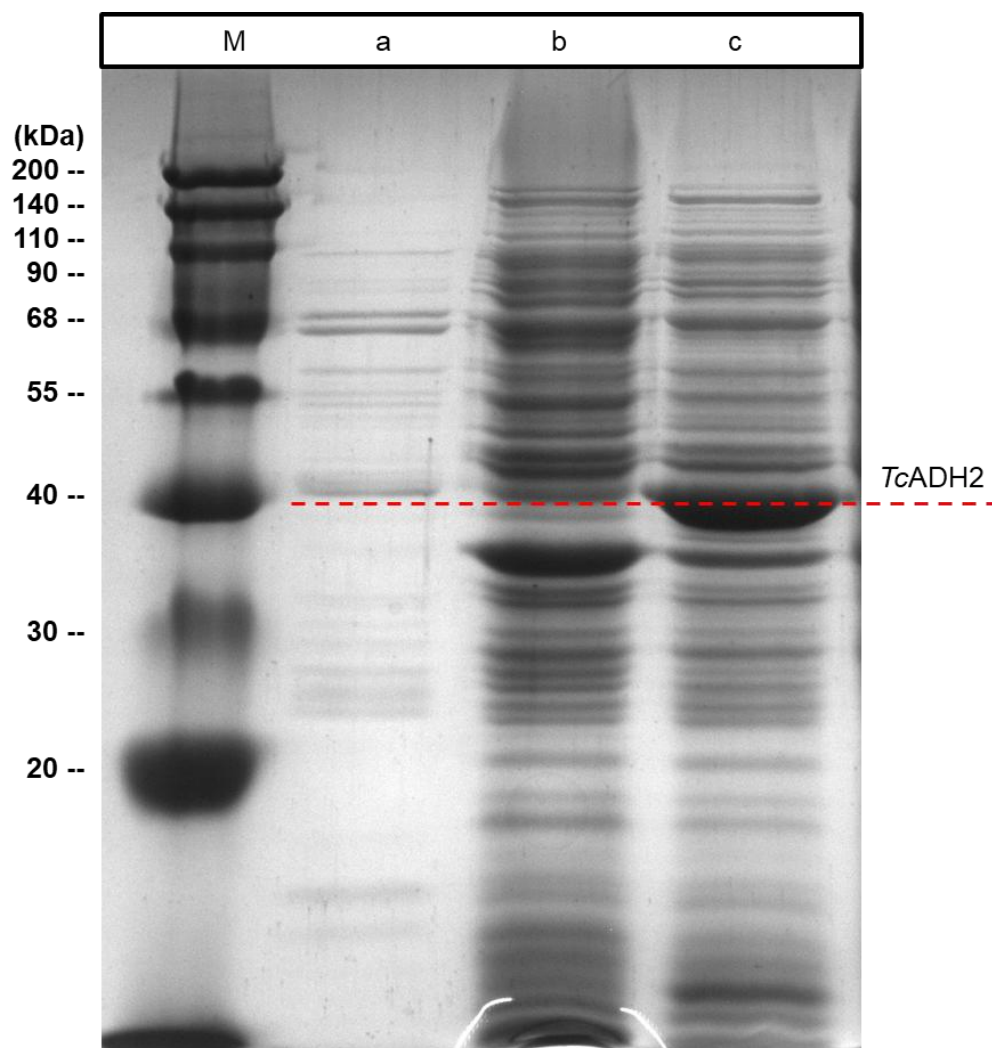

**Fig. S6** SDS-PAGE analysis of *TcADH2* (41.4 kDa) purification process. M: Marker; a: Purified *TcADH2* solution; b: cell-free extract (supernatant) of *E. coli* expressing *TcADH2*; c: whole-cell protein of *E. coli* expressing *TcADH2*.

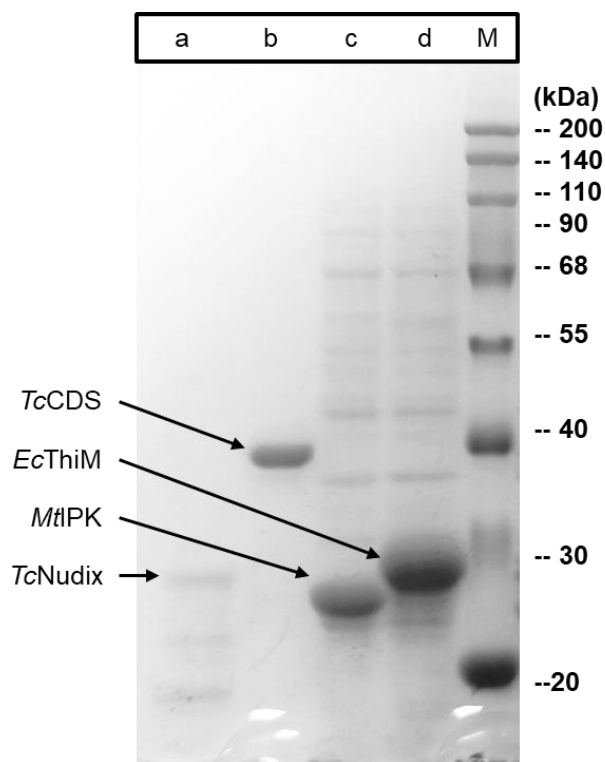

**Fig. S7** SDS-PAGE analysis of the purified enzymes involved in the cascade for synthesis of chrysanthemol. a: *TcNudix*; b: *TcCDS*; c: *MtIPK*; d: *EcThiM*; M: Marker.

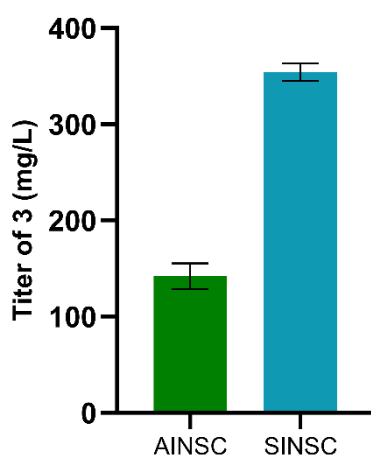

**Fig. S8** Titer of **3** using different IKs. The AINSC strain, expressing *AtFKI* as the IK, was transformed with pETDuet-*AtFKI*-IPK and pACYCDuet-*TcNudix*-Sumo*TcCDS*. In contrast, the SINSC strain, expressing *SmaThiM* as the IK, was transformed with the same set of expression vector.

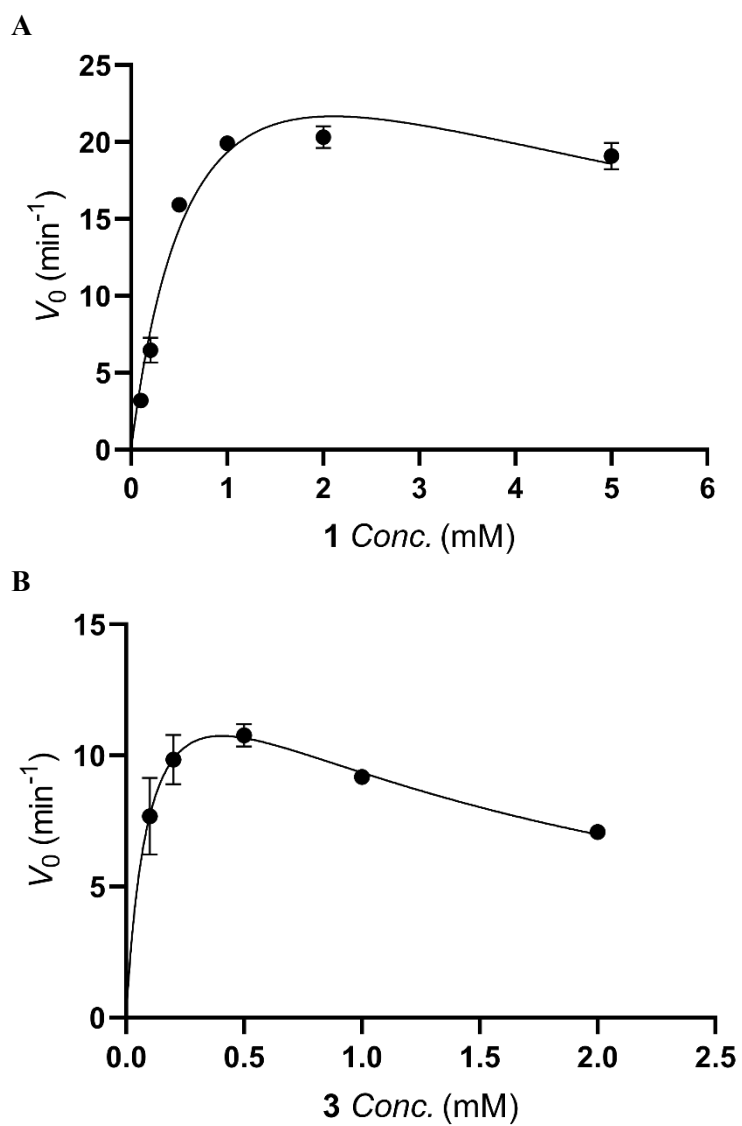

**Fig. S9** Haldane curves of *TcADH2*-catalyzed oxidation of **1** and **3**. (A) Haldane curves of *TcADH2*-catalyzed oxidation of **1**; (B) Haldane curves of *TcADH2*-catalyzed oxidation of **3**.

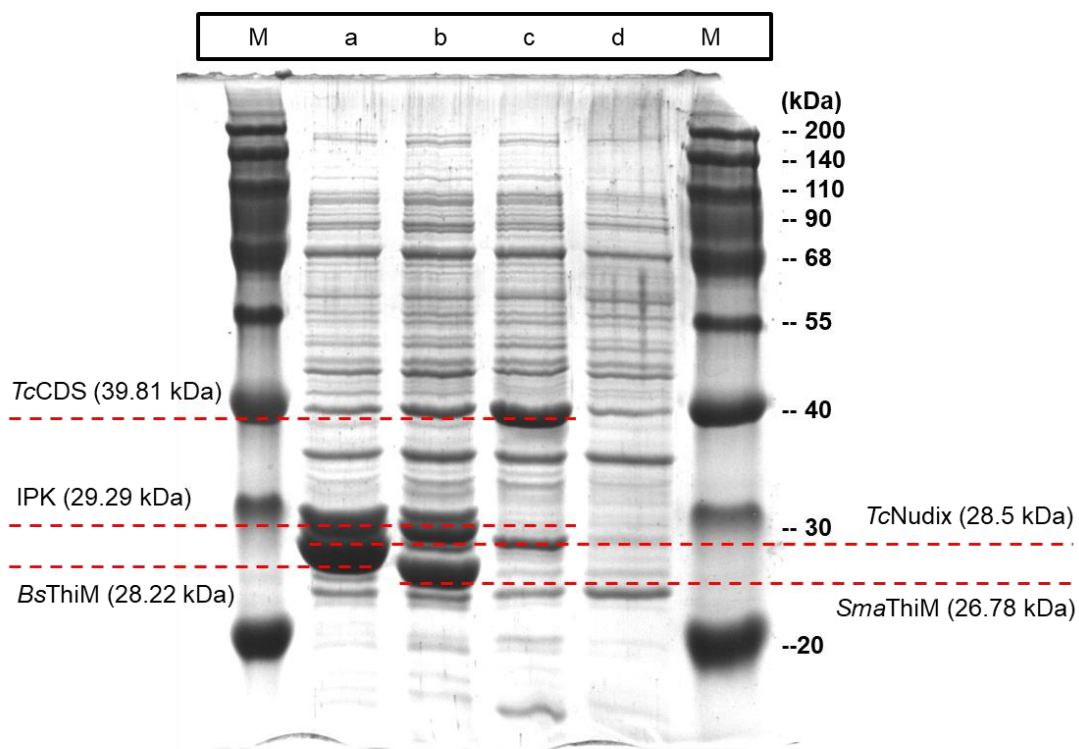

**Fig. S10** SDS-PAGE analysis of **3**-producing strains, which co-expresses pETDuet-*SmaThiM*/*BsThiM*-IPK and pACYCDuet-*TcNudix*-*TcCDS*. a: **3**-producing strains (expressing *BsThiM*); b: **3**-producing strains (expressing *SmaThiM*); c: the control group that was transferred by pACYCDuet-*TcNudix*-*TcCDS* only; d: the blank control group that was transferred by pETDuet-1 and pACYCDuet-1 without any target gene; M: Marker. According to the electrophoresis results, the 4 pathway enzymes IK (including *SmaThiM* (26.78 kDa) and *BsThiM* (28.22 kDa)), IPK (29.29 kDa), *TcNudix* (25.46 kDa) and *TcCDS* (39.81 kDa) in the **3**-producing strains were successfully expressed.

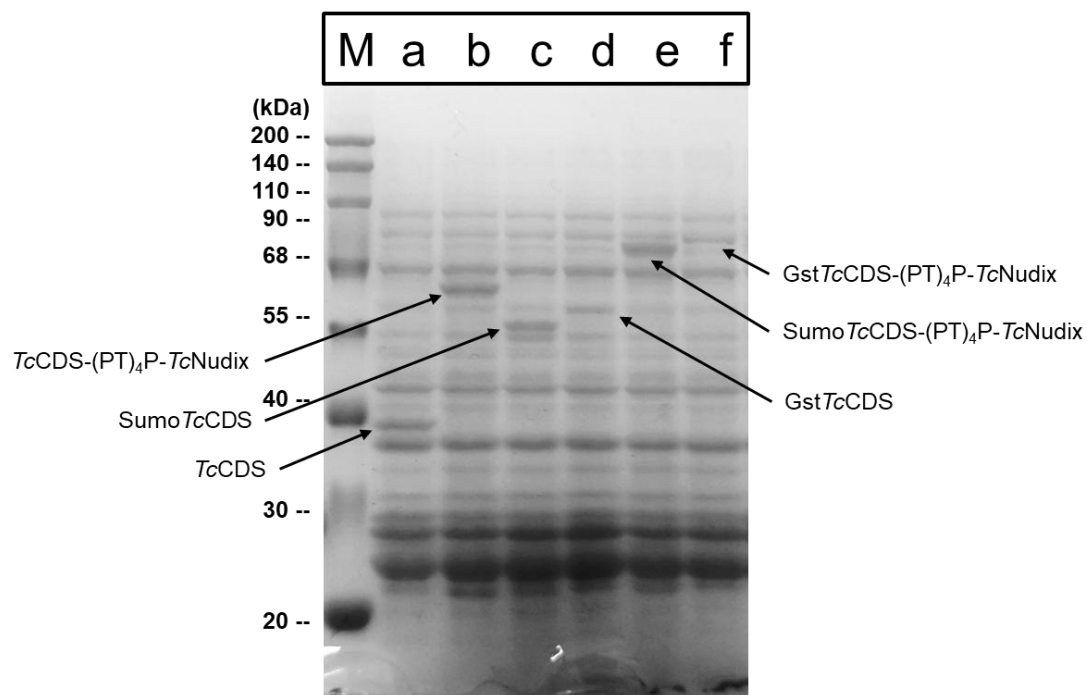

**Fig. S11** SDS-PAGE analysis of **3**-producing strains that fusing different solubility tags to the *TcCDS* N-terminus (in the AC-N-C vector) or to the fusion protein N-terminus (in the AC-C-(PT)<sub>4</sub>P-N vector): M: Marker; a: pACYCDuet-*TcNudix*-*TcCDS*; b: pACYCDuet-*TcCDS*-(PT)<sub>4</sub>P-*TcNudix*; c: pACYCDuet-*TcNudix*-Sumo*TcCDS*; d: pACYCDuet-*TcNudix*-Gst*TcCDS*; e: pACYCDuet-Sumo*TcCDS*-(PT)<sub>4</sub>P-*TcNudix*; f: pACYCDuet-Gst*TcCDS*-(PT)<sub>4</sub>P-*TcNudix*.

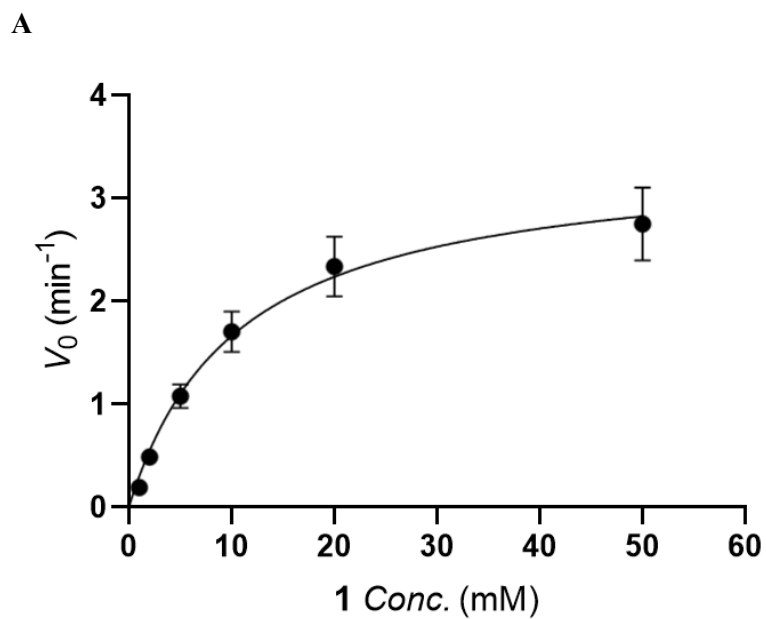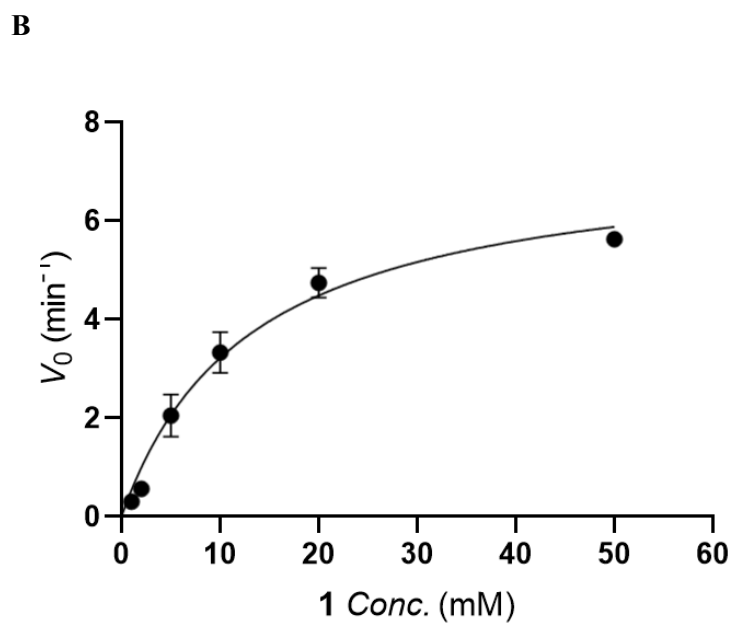

**Fig. S12** Michaelis–Menten curves of phosphorylation of 1 by *EcThiM* (A) and *SmaThiM* (B).

**A**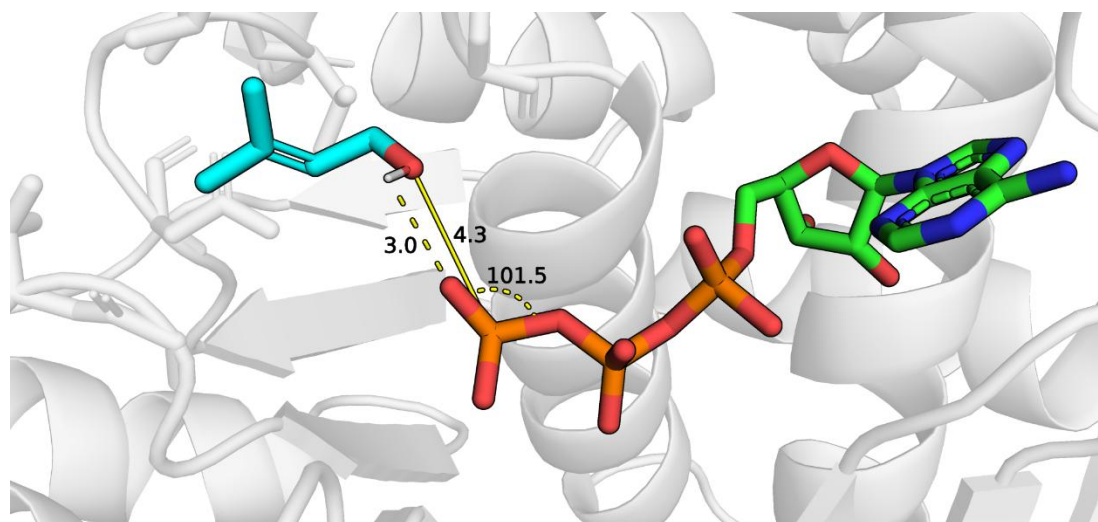**B**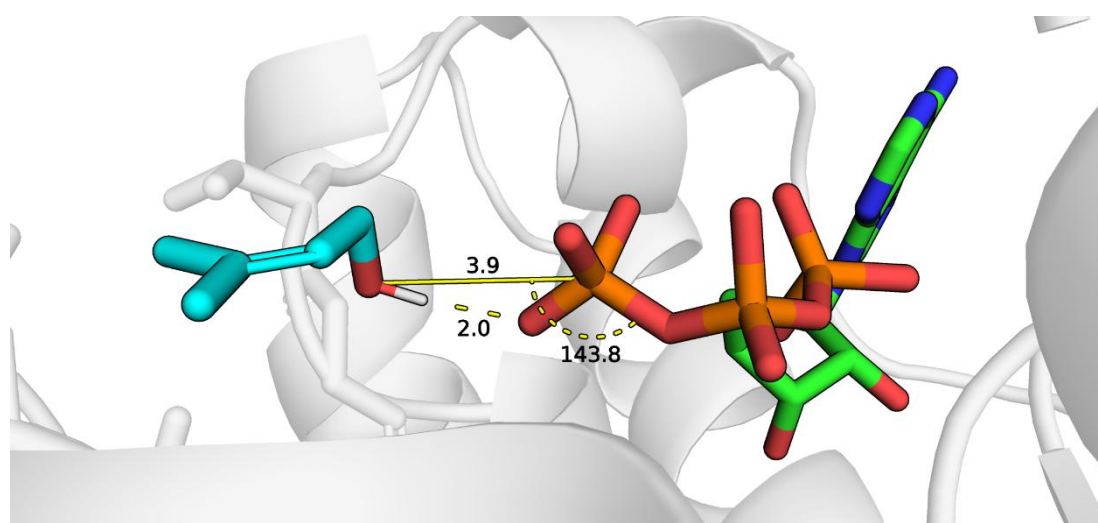

**Fig. S13** Molecular docking results of *EcThiM* (A) and *SmaThiM* (B). The angle formed by the prenyl hydroxyl oxygen, the ATP  $\gamma$ -phosphorus atom, and the leaving group oxygen is  $143.8^\circ$  in *SmaThiM*, compared to  $101.5^\circ$  in *EcThiM*. The former more closely approaches the optimal geometry for an in-line attack, thereby conferring a catalytic advantage.<sup>5, 6</sup> Furthermore, hydroxyl hydrogen atom of **1** is positioned closer to the  $\gamma$ -phosphate oxygen atom (which may serve as a proton acceptor) in *SmaThiM* (2.0 Å) than in *EcThiM* (3.0 Å). Additionally, the hydroxyl oxygen atom is nearer to the  $\gamma$ -phosphorus atom of ATP in *SmaThiM* (3.9 Å) than in *EcThiM* (4.3 Å). Under the substrate-assisted catalysis mechanism,<sup>7</sup> these proximity effects allow prenyl in *SmaThiM* to be more readily deprotonated to form an oxyanion, which can then more easily attack the  $\gamma$ -phosphate group of ATP to drive the reaction forward.

**A**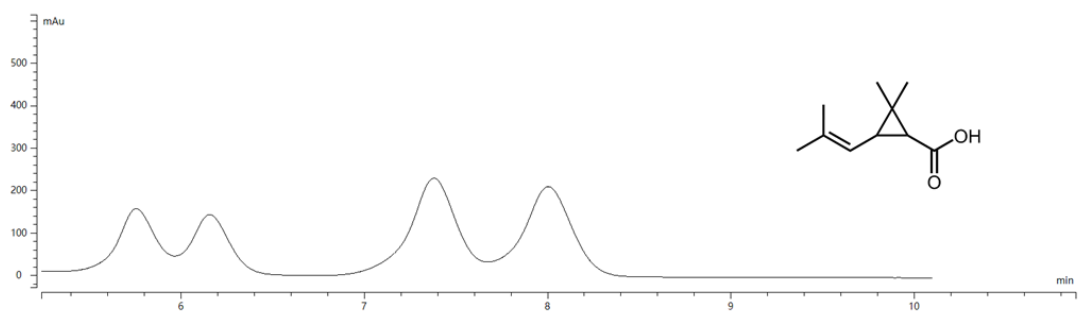**B**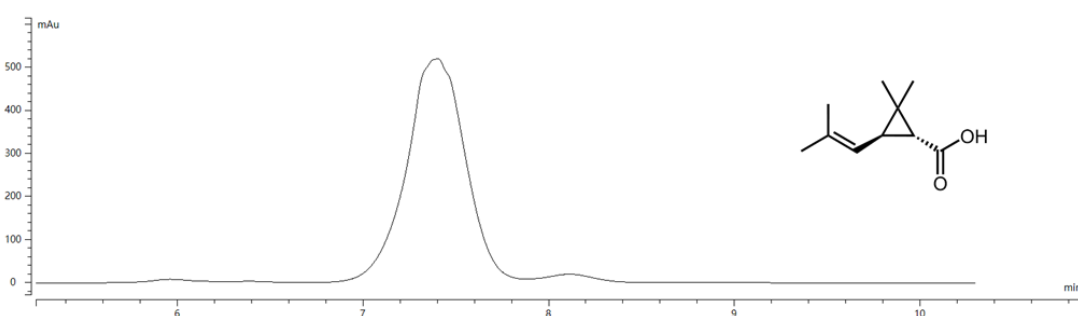**C**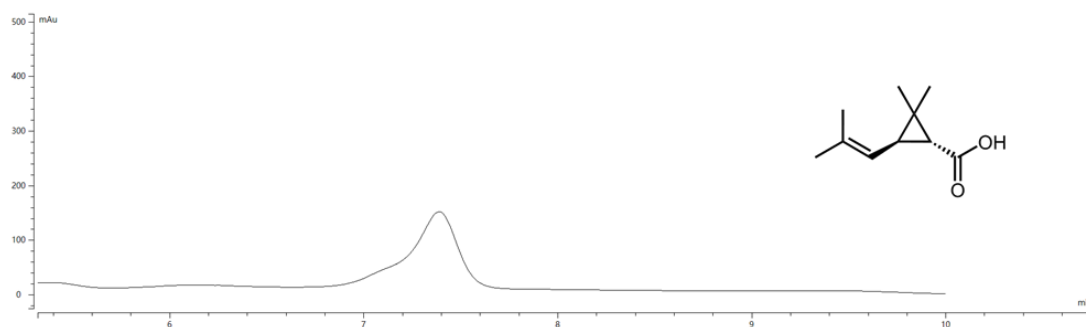

**Fig. S14** Chiral HPLC analysis of (±)-chrysanthemic acid standard, (1*R*, 3*R*)-chrysanthemic acid standard, and product **4**. (A) (±)-chrysanthemic acid standard; (B) (1*R*, 3*R*)-chrysanthemic acid standard; (C) Product **4** produced by the SINSCSAA strain.

## Reference

1. S. Lund, R. Hall and G. J. Williams, *ACS Synth. Biol.*, 2019, **8**, 232-238.
2. L. A. Johnson, A. Dunbabin, J. C. Benton, R. J. Mart and R. K. Allemann, *Angew. Chem. Int. Ed.*, 2020, **59**, 8486-8490.
3. W. Du, Z. Cheng, X. Pan, C. Liu, M. Yue, T. Li, Z. Xiao, L.-L. Li, X. Zeng, X. Lin, F. Li and L.-B. Dong, *Angew. Chem. Int. Ed.*, 2025, **64**, e202419463.
4. A. O. Chatzivasileiou, V. Ward, S. M. Edgar and G. Stephanopoulos, *Proc. Natl. Acad. Sci. USA*, 2019, **116**, 506-511.
5. Z. Wang and P. A. Cole, in *Methods Enzymol.*, ed. K. M. Shokat, Academic Press, 2014, vol. 548, pp. 1-21.
6. G. K. Smith, Z. Ke, H. Guo and A. C. Hengge, *J. Phys. Chem. B*, 2011, **115**, 13713-13722.
7. I. Bordes, R. Castillo and V. Moliner, *J. Phys. Chem. B*, 2017, **121**, 8878-8892.
